# Supplementary material for: Identification and analysis of brown planthopper-responsive microRNAs in resistant and susceptible rice plants
Source: PubMed Central journal article supplement (PMC5562839; doi:10.1038/s41598-017-09143-y), 2017-08-18
Supplement: 41598_2017_9143_MOESM1_ESM.pdf [file 41598_2017_9143_MOESM1_ESM.pdf]

## Supplementary Information

**Title: Identification and analysis of brown planthopper-responsive microRNAs in resistant and susceptible rice plants**

**Authors :** Yan Wu<sup>1</sup>, Wentang Lv<sup>1,2</sup>, Liang Hu<sup>1</sup>, Weiwei Rao<sup>1</sup>, Ya Zeng<sup>1</sup>, Lili Zhu<sup>1</sup>, Yuqing He<sup>3</sup>, Guangcun He<sup>1,\*</sup>

**Affiliation:**

**1.**National Key Laboratory of Hybrid Rice, College of Life Sciences, Wuhan University, Wuhan 430072, China

**2.**Shandong Rice Research Institute, Shandong Academy of Agricultural Sciences, Jinan 250100, China

**3.**National Key Laboratory of Crop Genetic Improvement, Huazhong Agricultural University, Wuhan 430070, China

**\*Corresponding author:**

National Key Laboratory of Hybrid Rice, College of Life Sciences, Wuhan University, Wuhan 430072, China. Phone: +86-27-68752384 Fax: +86-27-68752327 Email: [gche@whu.edu.cn](mailto:gche@whu.edu.cn)

## Supplemental Materials

**Supplemental Figure S1.** The preference distribution for uridine at the 5' end position of different lengths (nt) of known miRNAs.

**Supplemental Figure S2.** The preference distribution for uridine at the 5' end position of different lengths (nt) of novel miRNAs compared to known miRNAs of other selected plants in miRBase.

**Supplemental Figure S3.** The preference distribution for uridine at the 5' end position of different lengths (nt) of novel miRNAs identified by secondary structure prediction.

**Supplemental Figure S4.** Predicted secondary structures of the seven novel miRNAs.

**Supplemental Figure S5.** Original blots showing cropped areas for making Fig. 8c and 8d.

**Supplemental Table S1.** Novel miRNAs compared to the known miRNAs of other selected plants in miRBase and their total counts  $\geq 100$ .

**Supplemental Table S2.** Novel miRNAs identified by secondary structure prediction and their total counts  $\geq 100$ .

**Supplemental Table S3.** The target prediction of the differently expressed miRNAs in P15-0/PC-0.

**Supplemental Table S4.** The GO annotation of 94 resistance-related targets exhibiting the opposite expression to 46 differently expressed miRNAs.

**Supplemental Table S5.** Primers used for qRT-PCR and transformation of rice protoplasts.

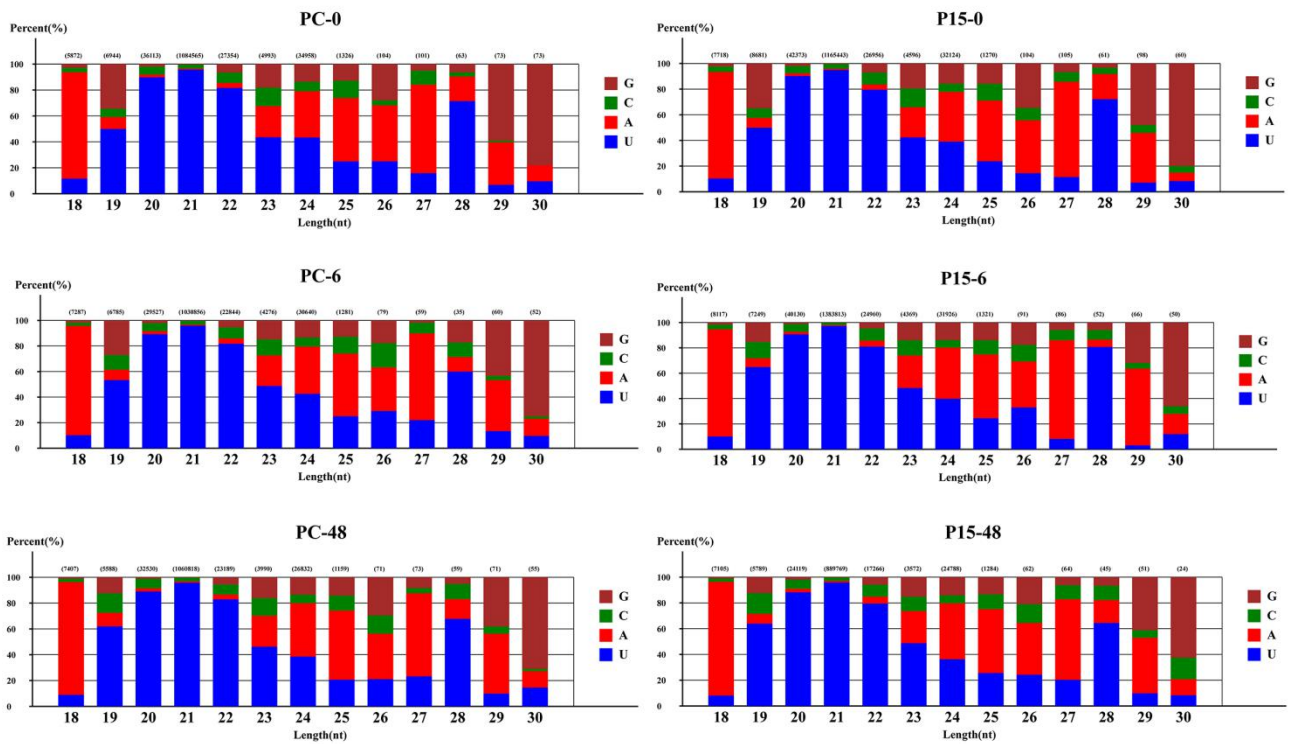

Supplemental Figure S1. The preference distribution for uridine at the 5' end position of different lengths (nt) of known miRNAs.

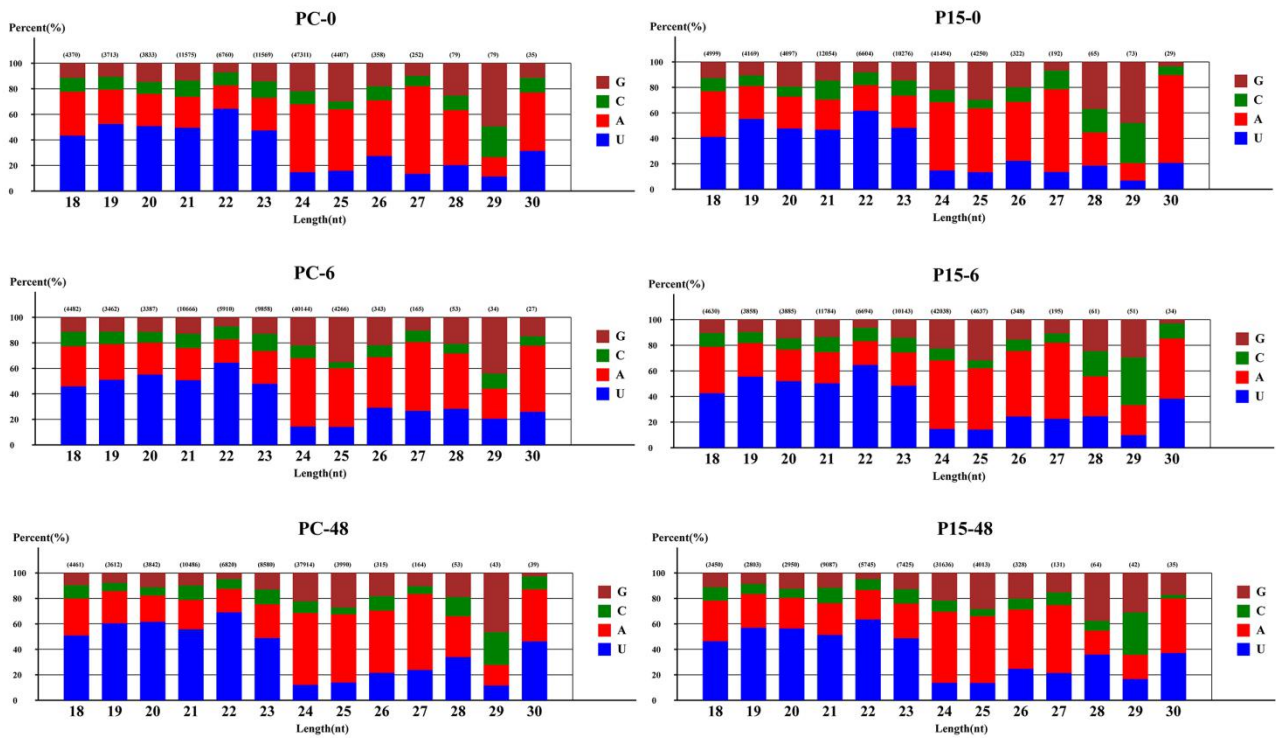

**Supplemental Figure S2.** The preference distribution for uridine at the 5' end position of different lengths (nt) of novel miRNAs compared to known miRNAs of other selected plants in miRBase.

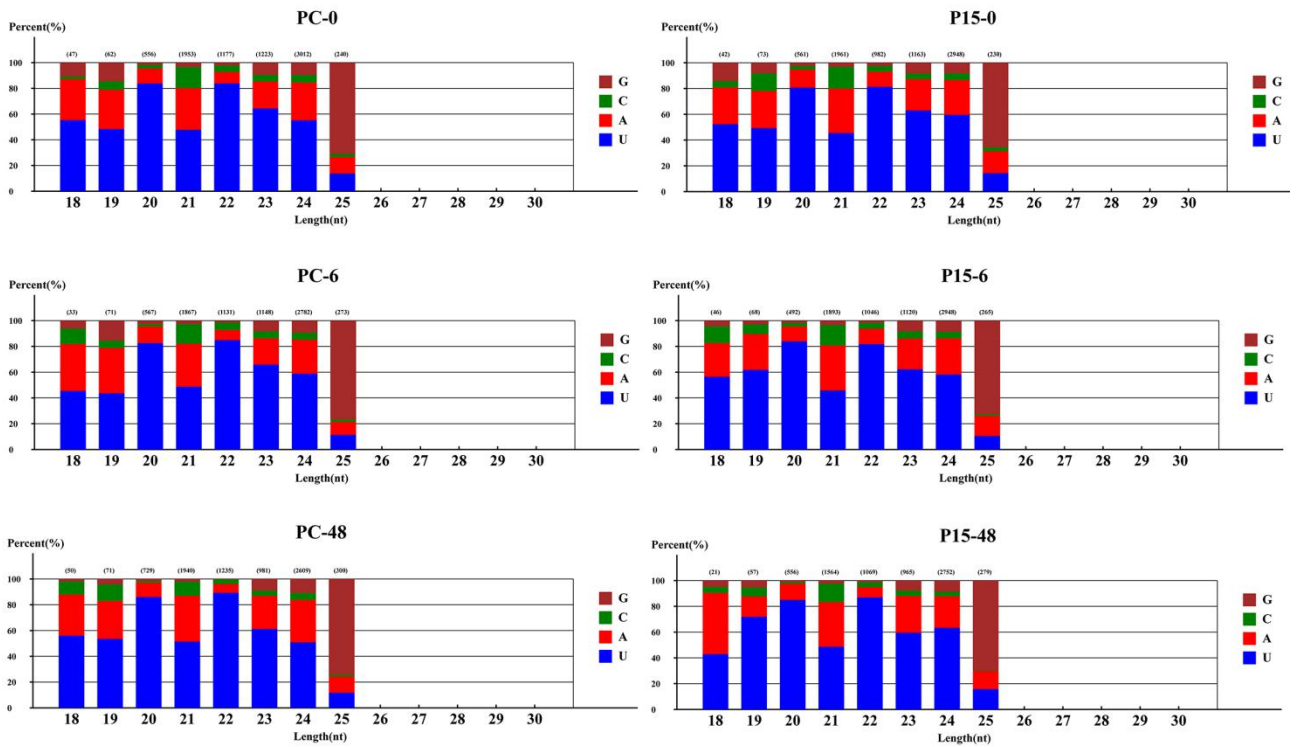

**Supplemental Figure S3. The preference distribution for uridine at the 5' end position of different lengths (nt) of novel miRNAs identified by secondary structure prediction.**

**m0131-5p**

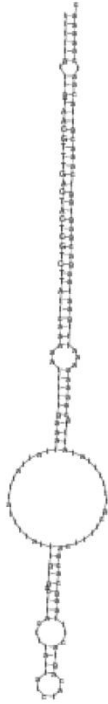

**m0269-3p**

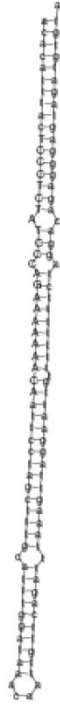

**m0465-3p**

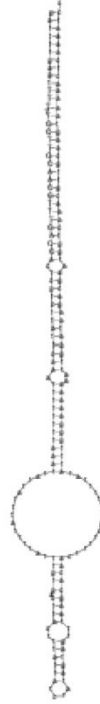

**m0017-3p**

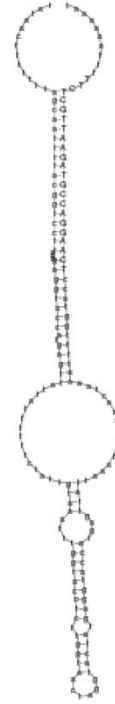

**m0073-5p**

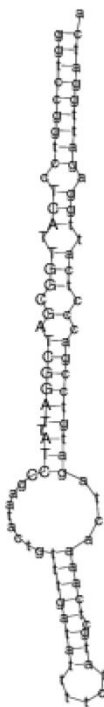

**m0546-3p**

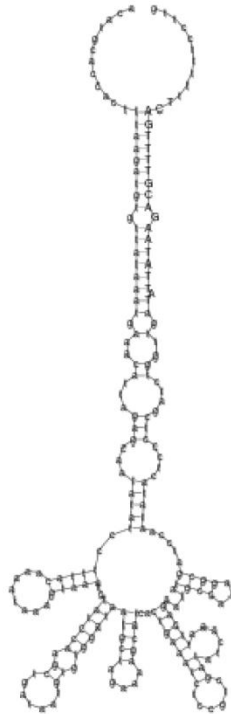

**m0494-3p**

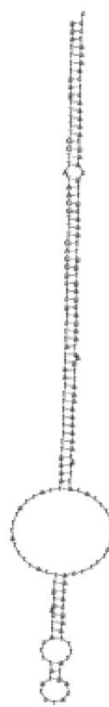

**Supplemental Figure S4. Predicted secondary structures of the seven novel miRNAs.**

**a** Original blots

Fig. 8c, 8d

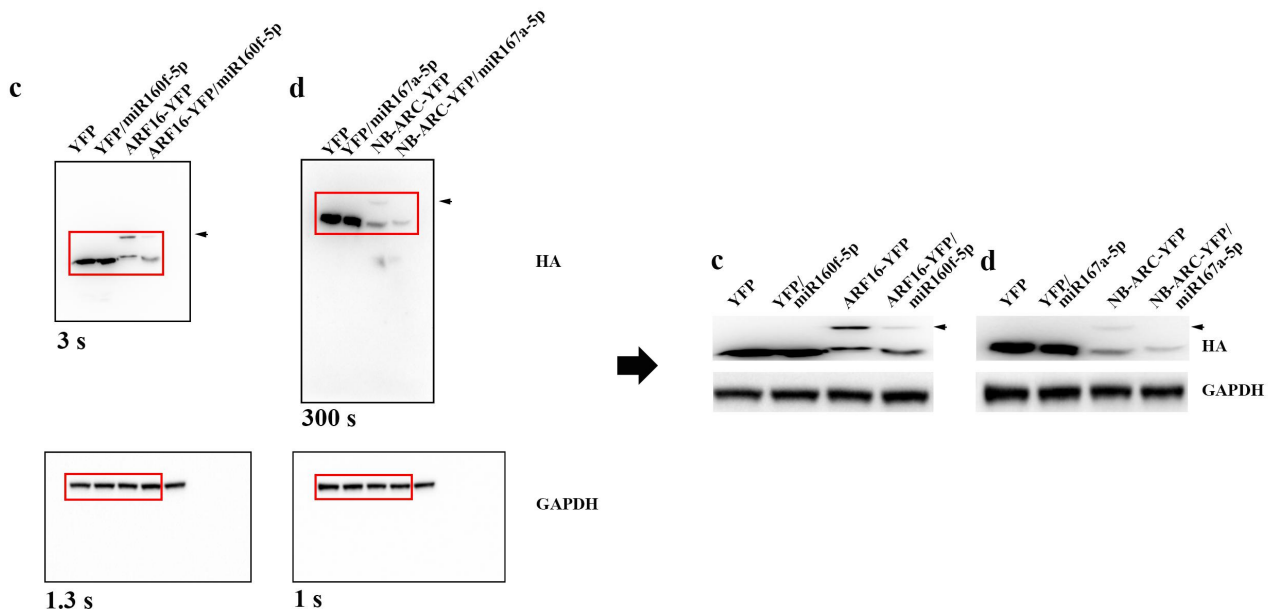

**b**

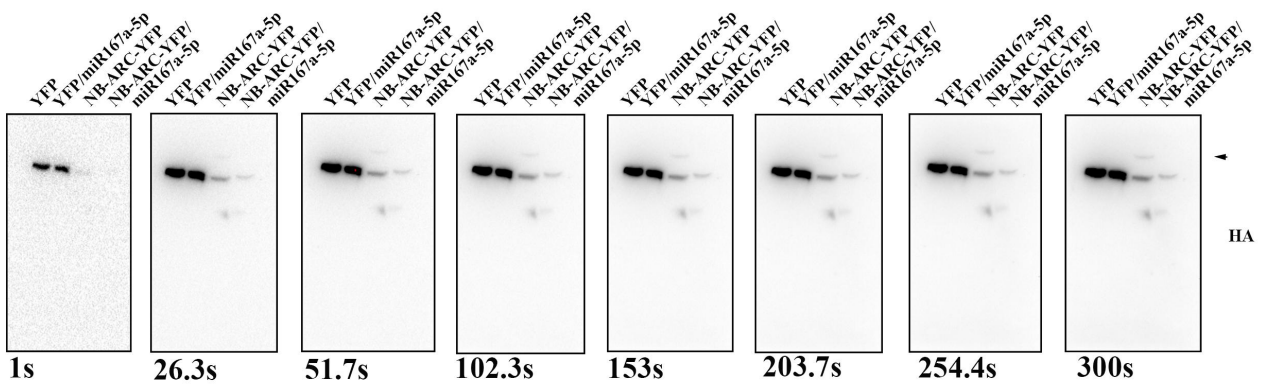

**Supplemental Figure S5. Original blots showing cropped areas for making Fig. 8c and 8d. a.** Red boxes in the original blots indicate cropped areas for the construction of Fig. 8c and 8d. The numbers below the original blots indicate the exposure time (s). **b.** The western detected by anti-HA antibody in Fig. 8d exposed at different time points (s).

**Supplemental Table S1. Novel miRNAs compared to the known miRNAs of other selected plants in miRBase and their total counts  $\geq 100$ .**

| ID        | Length | Seq                           | Total | PC-0_count | PC-6_count | PC-48_count | P15-0_count | P15-6_count | P15-48_count | PC-0_TPM  | PC-6_TPM  | PC-48_TPM | P15-0_TPM | P15-6_TPM | P15-48_TPM |
|-----------|--------|-------------------------------|-------|------------|------------|-------------|-------------|-------------|--------------|-----------|-----------|-----------|-----------|-----------|------------|
| MIR166-y  | 21     | GCTCGGACCAGGCTTCATTCC         | 17105 | 2883       | 2731       | 2670        | 2899        | 3698        | 2224         | 2145.2297 | 2169.6403 | 2080.5816 | 2032.8766 | 2249.3028 | 2061.7104  |
| MIR812-y  | 24     | AAGACGGACGGTCAAACATTGGAC      | 13388 | 2675       | 2153       | 1979        | 2411        | 2553        | 1617         | 1990.4577 | 1710.4488 | 1542.124  | 1690.6746 | 1552.8583 | 1499.0044  |
| MIR894-x  | 19     | TTTCACGTGCGGTTCCACCA          | 8362  | 1386       | 878        | 1313        | 2093        | 1663        | 1029         | 1031.3175 | 697.5262  | 1023.1474 | 1467.6822 | 1011.5172 | 953.9119   |
| MIR159-y  | 23     | TTGGATTGAAGGGAGCTCTGTT        | 3397  | 633        | 470        | 490         | 602         | 758         | 444          | 471.013   | 373.391   | 381.8296  | 422.1427  | 461.0523  | 411.6005   |
| MIR5073-x | 25     | GTTTGGTGAATCGGAACTTTTTTC      | 2961  | 511        | 725        | 289         | 391         | 642         | 403          | 380.2332  | 575.9755  | 225.2015  | 274.1824  | 390.4955  | 373.5923   |
| MIR396-x  | 22     | TCCACAGGCTTCTTGAAGTTC         | 2676  | 428        | 342        | 444         | 528         | 543         | 391          | 318.4732  | 271.7016  | 345.9844  | 370.2514  | 330.2789  | 362.468    |
| MIR5139-x | 18     | AACCTGGCTGTGATACCA            | 2491  | 429        | 276        | 348         | 650         | 527         | 261          | 319.2173  | 219.2679  | 271.1769  | 455.8019  | 320.5469  | 241.9543   |
| MIR1511-y | 18     | AACCTGGCTCTGATACCA            | 2297  | 387        | 255        | 326         | 599         | 493         | 237          | 287.9653  | 202.5845  | 254.0336  | 420.039   | 299.8665  | 219.7057   |
| MIR8155-y | 18     | AACCTGGCTCTGATACCA            | 2280  | 382        | 253        | 322         | 599         | 487         | 237          | 284.2448  | 200.9956  | 250.9166  | 420.039   | 296.217   | 219.7057   |
| MIR5168-y | 23     | TGGACCAAGGCTCAATCCCTTC        | 1813  | 335        | 299        | 248         | 346         | 383         | 202          | 249.2723  | 237.5403  | 193.2525  | 242.6269  | 232.9592  | 187.2597   |
| MIR529-x  | 21     | AGAAGAGAGAGATACAGCCA          | 1769  | 220        | 279        | 277         | 313         | 318         | 362          | 163.7012  | 221.6513  | 215.8506  | 219.4862  | 193.423   | 335.5842   |
| MIR8175-y | 18     | TCCCGGCAACGGCGCCA             | 1585  | 204        | 236        | 312         | 375         | 222         | 236          | 151.7957  | 187.49    | 243.1241  | 262.9627  | 135.0312  | 218.7786   |
| MIR5145-x | 24     | CACCTGTTGGATCCCTTGAGAGCT      | 1215  | 258        | 193        | 159         | 227         | 267         | 111          | 191.9769  | 153.3287  | 123.8998  | 159.1801  | 162.4023  | 102.9001   |
| MIR1862-y | 24     | TACGAGATTGGTTAATTTGAGAC       | 1119  | 210        | 187        | 170         | 185         | 210         | 157          | 156.2602  | 148.562   | 132.4715  | 129.7282  | 127.7322  | 145.5434   |
| MIR812-x  | 20     | TTCACGTCAACGTTTGACT           | 1068  | 157        | 170        | 221         | 192         | 180         | 148          | 116.8231  | 135.0563  | 172.2129  | 134.6369  | 109.4847  | 137.2002   |
| MIR827-y  | 21     | AGATGACCATCAGCAAACAAG         | 1060  | 216        | 162        | 91          | 226         | 180         | 185          | 160.7248  | 128.7007  | 70.9112   | 158.4788  | 109.4847  | 171.5002   |
| MIR166-z  | 21     | TATCGGACCAGGCTTCATTCC         | 978   | 175        | 154        | 152         | 172         | 189         | 136          | 130.2169  | 122.3451  | 118.4451  | 120.6122  | 114.959   | 126.0758   |
| MIR477-x  | 18     | TCTCCCTCAAAAGTCTCT            | 727   | 135        | 189        | 63          | 138         | 128         | 74           | 100.453   | 150.1509  | 49.0924   | 96.7703   | 77.8558   | 68.6001    |
| MIR156-x  | 22     | CTTGACAGAAGAGATGGAGCAC        | 710   | 138        | 103        | 110         | 150         | 121         | 88           | 102.6853  | 81.8282   | 85.7168   | 105.1851  | 73.5981   | 81.5785    |
| MIR169-y  | 22     | GGCAAGTCTGCTTGGCTACT          | 708   | 167        | 116        | 76          | 165         | 94          | 90           | 124.2641  | 92.1561   | 59.2225   | 115.7036  | 57.1754   | 83.4325    |
| MIR168-x  | 23     | TCGCTTGGTCAGATCGGACCT         | 680   | 106        | 84         | 96          | 157         | 136         | 101          | 78.8742   | 66.7337   | 74.8074   | 110.0937  | 82.7218   | 93.6298    |
| MIR5825-y | 24     | AAACATCTTAAACCTGAAACGGGA      | 612   | 102        | 119        | 119         | 92          | 85          | 95           | 75.8978   | 94.5394   | 92.73     | 64.5135   | 51.7011   | 88.0677    |
| MIR814-x  | 24     | ACACATCTAGTACAACGAATCTG       | 591   | 106        | 87         | 109         | 102         | 107         | 80           | 78.8742   | 69.1171   | 84.9376   | 71.5258   | 65.0826   | 74.1622    |
| MIR1133-x | 21     | TTATACTCCCTCCGTCCTCCAAA       | 586   | 111        | 93         | 76          | 114         | 106         | 86           | 82.5947   | 73.8838   | 59.2225   | 79.9406   | 64.4743   | 79.7244    |
| MIR160-x  | 19     | TGCTTGGCTCCCTGATTT            | 547   | 65         | 91         | 83          | 110         | 85          | 113          | 48.3663   | 72.2949   | 64.6773   | 77.1357   | 51.7011   | 104.7542   |
| MIR5054-y | 18     | TCCACAGGACGGCGCCA             | 484   | 67         | 79         | 94          | 108         | 76          | 60           | 49.8545   | 62.7615   | 73.2489   | 75.7332   | 46.2269   | 55.6217    |
| MIR393-x  | 23     | TCCAAAGGATCGCATTGATTTT        | 473   | 80         | 67         | 78          | 97          | 75          | 76           | 59.5277   | 53.2281   | 60.781    | 68.0197   | 45.6186   | 70.4541    |
| MIR6225-x | 21     | TTAGACTCAAAGATTCGTCT          | 415   | 85         | 69         | 79          | 59          | 70          | 53           | 63.2482   | 54.817    | 61.5603   | 41.3728   | 42.5774   | 49.1325    |
| MIR818-y  | 24     | AAATCCCTATATGTAGGACGGGA       | 414   | 77         | 57         | 87          | 71          | 58          | 64           | 57.2954   | 45.2836   | 67.7942   | 49.7876   | 35.2784   | 59.3298    |
| MIR9774-y | 22     | AGCAAGATATGGGTATTTCTT         | 390   | 52         | 54         | 91          | 60          | 40          | 93           | 38.693    | 42.9002   | 70.9112   | 42.074    | 24.3299   | 86.2136    |
| MIR1128-x | 21     | TTATACTCCCTCCGTCCTCCAAA       | 371   | 88         | 55         | 49          | 72          | 71          | 36           | 65.4805   | 43.6947   | 38.183    | 50.4888   | 43.1856   | 33.373     |
| MIR319-y  | 23     | CTTGGACTGAAGGGTGTCCCTT        | 366   | 56         | 57         | 57          | 58          | 85          | 53           | 41.6694   | 45.2836   | 44.4169   | 40.6716   | 51.7011   | 49.1325    |
| MIR5150-y | 24     | AGAAGTGCAGCTGTAGAAGCTC        | 356   | 64         | 72         | 65          | 61          | 48          | 46           | 47.6222   | 57.2003   | 50.6509   | 42.7753   | 29.1959   | 42.6433    |
| MIR5160-y | 24     | GCGAGATCGACGGTATATTCTGT       | 352   | 77         | 69         | 43          | 43          | 66          | 54           | 57.2954   | 54.817    | 33.5075   | 30.1531   | 40.1444   | 50.0595    |
| MIR444-y  | 21     | TGTTGTCTCAAGCTTGCTGTT         | 327   | 63         | 44         | 58          | 66          | 50          | 46           | 46.8781   | 34.9558   | 45.1962   | 46.2814   | 30.4124   | 42.6433    |
| MIR166-z  | 23     | GGAATGTTGCTGGTCAAGGAT         | 320   | 55         | 40         | 51          | 69          | 64          | 41           | 40.9253   | 31.778    | 39.7414   | 48.3851   | 38.9279   | 38.0082    |
| MIR5827-x | 21     | TTTGTGGCACTTGGACACC           | 316   | 60         | 55         | 41          | 55          | 70          | 35           | 44.6458   | 43.6947   | 31.949    | 38.5679   | 42.5774   | 32.446     |
| MIR5794-y | 23     | TGAGGAATCACTAGTAGTCGTTT       | 315   | 53         | 41         | 61          | 44          | 64          | 52           | 39.4371   | 32.5724   | 47.5339   | 30.8543   | 38.9279   | 48.2055    |
| MIR156-y  | 23     | GCTCACTGCTCTGCTGTCATCC        | 302   | 75         | 47         | 45          | 61          | 39          | 35           | 55.8072   | 37.3391   | 35.066    | 42.7753   | 23.7217   | 32.446     |
| MIR1425-x | 23     | TAGGATCAATCTGTGCTGTTT         | 297   | 60         | 49         | 47          | 37          | 43          | 61           | 44.6458   | 38.928    | 36.6245   | 25.9456   | 26.1547   | 56.5487    |
| MIR159-x  | 19     | AGCTCCCTCGATCCAATT            | 296   | 57         | 56         | 49          | 56          | 35          | 43           | 42.4135   | 44.4891   | 38.183    | 39.2691   | 21.2887   | 39.8622    |
| MIR169-x  | 23     | TAGCAAGGATGATTTGGCTGTT        | 266   | 47         | 45         | 55          | 46          | 39          | 34           | 34.9725   | 35.7502   | 42.8584   | 32.2568   | 23.7217   | 31.519     |
| MIR7758-x | 22     | CCACTACCGTCAGTTGACCGTG        | 263   | 46         | 41         | 39          | 49          | 54          | 34           | 34.2284   | 32.5724   | 30.3905   | 34.3605   | 32.8454   | 31.519     |
| MIR6225-y | 21     | CGAGACGAATCTTTAAGCCT          | 255   | 53         | 36         | 27          | 53          | 52          | 34           | 39.4371   | 28.6002   | 21.0396   | 37.1654   | 31.6289   | 31.519     |
| MIR168-y  | 21     | CCCCTGACCAAGTAATT             | 248   | 45         | 41         | 31          | 61          | 31          | 39           | 33.4843   | 32.5724   | 24.1566   | 42.7753   | 18.8557   | 36.1541    |
| MIR5816-x | 24     | GCTAGGAGTGTGTAGGAACGCC        | 241   | 39         | 47         | 37          | 42          | 37          | 39           | 29.0198   | 37.3391   | 28.832    | 29.4518   | 22.5052   | 36.1541    |
| MIR165-y  | 20     | TGGACCAAGGCTTCTCCCT           | 238   | 40         | 27         | 49          | 48          | 52          | 22           | 29.7639   | 21.4501   | 38.183    | 33.6592   | 31.6289   | 20.3946    |
| MIR171-y  | 21     | TTGAGCCGTGCAATATCACT          | 237   | 42         | 40         | 28          | 52          | 39          | 36           | 31.252    | 31.778    | 21.8188   | 36.4642   | 23.7217   | 33.373     |
| MIR5801-x | 20     | TGTTTCCGATCGTTGGAT            | 230   | 34         | 37         | 29          | 49          | 53          | 28           | 25.2993   | 29.3946   | 22.5981   | 34.3605   | 32.2372   | 25.9568    |
| MIR5788-x | 21     | CGGATGTGACATATCTAGTA          | 228   | 48         | 35         | 40          | 42          | 32          | 31           | 35.7166   | 27.8057   | 31.1698   | 29.4518   | 19.464    | 28.7379    |
| MIR162-y  | 23     | TCGATAAACCTCTGCATCCAGTC       | 212   | 46         | 44         | 24          | 35          | 35          | 28           | 34.2284   | 34.9558   | 18.7019   | 24.5432   | 21.2887   | 25.9568    |
| MIR1441-y | 22     | TGGATGTCAGAAAAGGTTTTC         | 209   | 43         | 20         | 42          | 40          | 42          | 22           | 31.9961   | 15.889    | 32.7283   | 28.0494   | 25.5464   | 20.3946    |
| MIR5148-y | 24     | TGAGGGGTAGAAACGTCATATCGT      | 208   | 44         | 36         | 25          | 42          | 37          | 24           | 32.7402   | 28.6002   | 19.4811   | 29.4518   | 22.5052   | 22.2487    |
| MIR167-x  | 20     | TGAAGTCCGACGATGATTC           | 205   | 36         | 35         | 31          | 36          | 39          | 28           | 26.7875   | 27.8057   | 24.1566   | 25.2444   | 23.7217   | 25.9568    |
| MIR2121-y | 24     | GAAAACGGACGGTCTATTAGAGC       | 205   | 42         | 41         | 22          | 36          | 35          | 29           | 31.252    | 32.5724   | 17.1434   | 25.2444   | 21.2887   | 26.8838    |
| MIR1423-x | 24     | GCAACTACAGTGTGGCGCTCGAA       | 195   | 41         | 36         | 25          | 41          | 32          | 20           | 30.5079   | 28.6002   | 19.4811   | 28.7506   | 19.464    | 18.5406    |
| MIR5072-x | 18     | TCCCGAGTGGAGTCGCCA            | 189   | 26         | 29         | 30          | 40          | 24          | 40           | 19.3465   | 23.039    | 23.3773   | 28.0494   | 14.598    | 37.0811    |
| MIR5799-x | 24     | AGACGAATGGTCAAACGTTGGACA      | 186   | 32         | 40         | 22          | 40          | 28          | 24           | 23.8111   | 31.778    | 17.1434   | 28.0494   | 17.031    | 22.2487    |
| MIR5808-x | 20     | TCGTTCCGATCGTTGGATC           | 184   | 25         | 33         | 28          | 36          | 37          | 25           | 18.6024   | 26.2168   | 21.8188   | 25.2444   | 22.5052   | 23.1757    |
| MIR820-x  | 23     | TCGGCTCGTGGATGGACCAGGT        | 177   | 26         | 31         | 29          | 29          | 32          | 30           | 19.3465   | 24.6279   | 22.5981   | 20.3358   | 19.464    | 27.8108    |
| MIR3981-y | 18     | TTAGGATACGTCATCT              | 177   | 27         | 29         | 54          | 23          | 23          | 21           | 20.0906   | 23.039    | 42.0792   | 16.1284   | 13.9897   | 19.4676    |
| MIR1863-y | 26     | TAGAAACTGGCTGATGCATTACTC<br>A | 175   | 34         | 28         | 24          | 25          | 41          | 23           | 25.2993   | 22.2446   | 18.7019   | 17.5308   | 24.9382   | 21.3216    |
| MIR396-y  | 21     | ATAGTTCAAGAAAGTCTTTT          | 166   | 24         | 25         | 18          | 47          | 29          | 23           | 17.8583   | 19.8612   | 14.0264   | 32.958    | 17.6392   | 21.3216    |
| MIR1436-y | 23     | TACATTGAAACGGAGGAGTA          | 165   | 37         | 43         | 24          | 18          | 23          | 20           | 27.5316   | 34.1613   | 18.7019   | 12.6222   | 13.9897   | 18.5406    |
| MIR2120-y | 24     | AATAGATCTTGTCCCGTTGGT         | 163   | 28         | 28         | 29          | 35          | 26          | 17           | 20.8347   | 22.2446   | 22.5981   | 24.5432   | 15.8145   | 15.7595    |
| MIR167-y  | 21     | AGGTCATGCTGAAGTTTCATC         | 163   | 27         | 29         | 21          | 34          | 30          | 22           | 20.0906   | 23.039    | 16.3641   | 23.8419   | 18.2475   | 20.3946    |



|           |    |                              |     |    |    |    |    |    |    |         |         |         |         |         |         |
|-----------|----|------------------------------|-----|----|----|----|----|----|----|---------|---------|---------|---------|---------|---------|
| MIR2880-x | 24 | GACGATATCCCGTTCGGACAAGAT     | 150 | 21 | 31 | 24 | 26 | 25 | 23 | 15.626  | 24.6279 | 18.7019 | 18.2321 | 15.2062 | 21.3216 |
| MIR393-y  | 19 | TCAGTGAATCCCTTGTT            | 145 | 21 | 24 | 32 | 27 | 25 | 16 | 15.626  | 19.0668 | 24.9358 | 18.9333 | 15.2062 | 14.8324 |
| MIR390-x  | 21 | AGCTCAGGATAGATAGCGCCT        | 142 | 33 | 14 | 20 | 28 | 21 | 26 | 24.5552 | 11.1223 | 15.5849 | 19.6345 | 12.7732 | 24.1027 |
| MIR1883-x | 25 | CCTGTGACGGCCGAGAATGGAAC<br>T | 138 | 20 | 26 | 20 | 21 | 27 | 24 | 14.8819 | 20.6557 | 15.5849 | 14.7259 | 16.4227 | 22.2487 |
| MIR2877-y | 24 | TTGCATCCTCTGCACATTGGGCCA     | 129 | 19 | 16 | 20 | 19 | 32 | 23 | 14.1378 | 12.7112 | 15.5849 | 13.3234 | 19.464  | 21.3216 |
| MIR1120-y | 23 | TTGTTATATTCTGAGACGGAGGG      | 129 | 20 | 25 | 14 | 28 | 22 | 20 | 14.8819 | 19.8612 | 10.9094 | 19.6345 | 13.3815 | 18.5406 |
| MIR6478-x | 20 | CCGACCTTAACTCAGTTGGT         | 129 | 19 | 18 | 24 | 30 | 20 | 18 | 14.1378 | 14.3001 | 18.7019 | 21.037  | 12.165  | 16.6865 |
| MIR394-x  | 22 | TTGGCATTCTGCCACCTCTCT        | 128 | 24 | 19 | 17 | 15 | 27 | 26 | 17.8583 | 15.0945 | 13.2471 | 10.5185 | 16.4227 | 24.1027 |
| MIR9777-y | 22 | GTAGCAAATATATCTGAGCACA       | 126 | 31 | 14 | 17 | 37 | 15 | 12 | 23.067  | 11.1223 | 13.2471 | 25.9456 | 9.1237  | 11.1243 |
| MIR1876-y | 24 | ATAAATGGGTTTGTGGCTGGCCC      | 123 | 17 | 21 | 12 | 25 | 25 | 23 | 12.6496 | 16.6834 | 9.3509  | 17.5308 | 15.2062 | 21.3216 |
| MIR2871-y | 23 | TATTTTAGTTTCTATGGTCACTC      | 121 | 20 | 21 | 19 | 18 | 14 | 29 | 14.8819 | 16.6834 | 14.8056 | 12.6222 | 8.5155  | 26.8838 |
| MIR399-y  | 21 | TGCCAGAGGAGAACTGCACTG        | 120 | 28 | 15 | 9  | 31 | 23 | 14 | 20.8347 | 11.9167 | 7.0132  | 21.7382 | 13.9897 | 12.9784 |
| MIR2871-x | 21 | TGACCGTAGAAACTAGCATTT        | 118 | 15 | 26 | 17 | 16 | 22 | 22 | 11.1614 | 20.6557 | 13.2471 | 11.2197 | 13.3815 | 20.3946 |
| MIR5568-x | 18 | TTATAAGACGTTTTGACT           | 114 | 14 | 21 | 23 | 20 | 22 | 14 | 10.4173 | 16.6834 | 17.9226 | 14.0247 | 13.3815 | 12.9784 |
| MIR2873-y | 18 | TGAAGTTGAGTTGGACT            | 113 | 26 | 17 | 16 | 19 | 22 | 13 | 19.3465 | 13.5056 | 12.4679 | 13.3234 | 13.3815 | 12.0514 |
| MIR1846-x | 23 | TCCACCGAGCAGCCGGATCTTT       | 112 | 22 | 16 | 10 | 23 | 26 | 15 | 16.3701 | 12.7112 | 7.7924  | 16.1284 | 15.8145 | 13.9054 |
| MIR5205-x | 24 | CTTATAATTTGGGACGGAGGAGT      | 110 | 21 | 19 | 20 | 17 | 19 | 14 | 15.626  | 15.0945 | 15.5849 | 11.921  | 11.5567 | 12.9784 |
| MIR1423-y | 24 | GAGCGCCGAGCGGTAGTTGTCTG      | 105 | 22 | 19 | 9  | 22 | 15 | 18 | 16.3701 | 15.0945 | 7.0132  | 15.4271 | 9.1237  | 16.6865 |
| MIR1873-x | 21 | TCAACATGGTATCAGAAGCTGT       | 103 | 18 | 16 | 25 | 16 | 20 | 8  | 13.3937 | 12.7112 | 19.4811 | 11.2197 | 12.165  | 7.4162  |

# Supplemental Table S2. Novel miRNAs identified by secondary structure prediction and their total counts $\geq 100$ .

| ID             | Length | Seq                     | Total | PC-0_count | PC-6_count | PC-48_count | P15-0_count | P15-6_count | P15-48_count | PC-0_TPM  | PC-6_TPM  | PC-48_TPM | P15-0_TPM | P15-6_TPM | P15-48_TPM |
|----------------|--------|-------------------------|-------|------------|------------|-------------|-------------|-------------|--------------|-----------|-----------|-----------|-----------|-----------|------------|
| novel-m0269-3p | 24     | TTTTTTTTCTAGGCAGAGGGAGT | 9679  | 1562       | 1640       | 1429        | 1610        | 1668        | 1770         | 1162.2785 | 1302.8964 | 1113.5398 | 1128.9863 | 1014.5584 | 1640.8397  |
| novel-m0465-3p | 21     | TCAAACGTTGCAAGTAAAAAC   | 2851  | 531        | 434        | 516         | 499         | 488         | 383          | 395.1152  | 344.7909  | 402.0899  | 349.9156  | 296.8252  | 355.0517   |
| novel-m0283-3p | 22     | TCAAACGTTGCAAGTAAAACT   | 2674  | 503        | 414        | 476         | 473         | 455         | 353          | 374.2805  | 328.9019  | 370.9202  | 331.6836  | 276.753   | 327.2409   |
| novel-m0215-3p | 23     | TCAAGGACCGTAGAATTGCTCTT | 2671  | 417        | 452        | 427         | 448         | 475         | 452          | 310.2882  | 359.091   | 332.7372  | 314.1527  | 288.918   | 419.0167   |
| novel-m0494-3p | 22     | TTAAACGTTGCAAGTAAAACT   | 2435  | 450        | 361        | 430         | 429         | 441         | 324          | 334.8434  | 286.7961  | 335.0749  | 300.8293  | 268.2376  | 300.3571   |
| novel-m0017-3p | 23     | TCAAGGACCGTAGAATTGCTCTT | 2390  | 361        | 407        | 404         | 397         | 416         | 405          | 268.6188  | 323.3408  | 314.8146  | 278.3898  | 253.0314  | 375.4464   |
| novel-m0569-3p | 23     | TCAAGGACCGTAGAATTGCTCTT | 2231  | 323        | 375        | 392         | 361         | 395         | 385          | 240.3431  | 297.9184  | 305.4637  | 253.1454  | 240.2581  | 356.9058   |
| novel-m0546-3p | 20     | TATTATAAGACGTTTGGACT    | 2157  | 377        | 361        | 421         | 343         | 314         | 341          | 280.5243  | 286.7961  | 328.0617  | 240.5232  | 190.99    | 316.1166   |
| novel-m0454-5p | 20     | ATATTATAAGACGTTTGGACT   | 2114  | 369        | 356        | 411         | 339         | 305         | 334          | 274.5715  | 282.8239  | 320.2693  | 237.7182  | 185.5158  | 309.6274   |
| novel-m0073-5p | 21     | TCATTGGCGATCGGATTATCC   | 1587  | 330        | 257        | 232         | 276         | 295         | 197          | 245.5518  | 204.1734  | 180.7846  | 193.5405  | 179.4333  | 182.6245   |
| novel-m0228-5p | 21     | TCATTGGCGATCGGATTATCC   | 1587  | 330        | 257        | 232         | 276         | 295         | 197          | 245.5518  | 204.1734  | 180.7846  | 193.5405  | 179.4333  | 182.6245   |
| novel-m0404-5p | 21     | TCATTGGCGATCGGATTATCC   | 1587  | 330        | 257        | 232         | 276         | 295         | 197          | 245.5518  | 204.1734  | 180.7846  | 193.5405  | 179.4333  | 182.6245   |
| novel-m0131-5p | 22     | TAACGTTTGACTACTCGTCTTA  | 1580  | 256        | 280        | 420         | 192         | 221         | 211          | 190.4887  | 222.4457  | 327.2825  | 134.6369  | 134.4229  | 195.6029   |
| novel-m0214-5p | 22     | TAACGTTTGACTACTCGTCTTA  | 1565  | 257        | 276        | 422         | 188         | 211         | 211          | 191.2328  | 219.2679  | 328.841   | 131.8319  | 128.3404  | 195.6029   |
| novel-m0240-5p | 22     | TAACGTTTGACTACTCGTCTTA  | 1534  | 252        | 272        | 410         | 184         | 208         | 208          | 187.5123  | 216.0901  | 319.4901  | 129.027   | 126.5157  | 192.8218   |
| novel-m0298-5p | 22     | TAACGTTTGACTACTCGTCTTA  | 1321  | 216        | 224        | 368         | 168         | 174         | 171          | 160.7248  | 177.9566  | 286.7618  | 117.8073  | 105.8352  | 158.5218   |
| novel-m0487-5p | 21     | ACACAATAGATGTTCCGGTCT   | 1252  | 259        | 177        | 176         | 258         | 255         | 127          | 192.721   | 140.6175  | 137.147   | 180.9183  | 155.1034  | 117.7326   |
| novel-m0269-5p | 23     | TCCCTCTATCCCAGAAAAAACA  | 1119  | 206        | 158        | 129         | 259         | 189         | 178          | 153.2838  | 125.5229  | 100.5225  | 181.6195  | 114.959   | 165.011    |
| novel-m0436-5p | 21     | ACACAATAGATGTTCCGGTCT   | 987   | 207        | 137        | 144         | 203         | 201         | 95           | 154.0279  | 108.8395  | 112.2111  | 142.3505  | 122.2579  | 88.0677    |
| novel-m0356-5p | 21     | AACCAACCTAATACCGGATGT   | 977   | 129        | 164        | 212         | 159         | 142         | 171          | 95.9884   | 130.2896  | 165.1997  | 111.4962  | 86.3713   | 158.5218   |
| novel-m0270-3p | 23     | AAACGTAGATTACTGATAAAACC | 661   | 107        | 72         | 97          | 122         | 132         | 131          | 79.6183   | 57.2003   | 75.5867   | 85.5505   | 80.2888   | 121.4407   |
| novel-m0009-3p | 22     | TTTGGACCGTATACTTTTCT    | 550   | 100        | 106        | 86          | 94          | 84          | 80           | 74.4096   | 84.2116   | 67.015    | 65.916    | 51.0929   | 74.1622    |
| novel-m0508-3p | 23     | TTAAACAGTTTGACTTTGACTA  | 546   | 112        | 93         | 96          | 84          | 87          | 74           | 83.3388   | 73.8838   | 74.8074   | 58.9036   | 52.9176   | 68.6001    |
| novel-m0362-5p | 21     | TTTGGGCTAGGTATTTTACC    | 492   | 77         | 72         | 80          | 102         | 97          | 64           | 57.2954   | 57.2003   | 62.3395   | 71.5258   | 59.0001   | 59.3298    |
| novel-m0195-3p | 21     | CCTGGCGCATGTCGAGGCGCT   | 465   | 76         | 91         | 69          | 81          | 58          | 90           | 56.5513   | 72.2949   | 53.7678   | 56.7999   | 35.2784   | 83.4325    |
| novel-m0375-3p | 23     | AGACGACCGTCAAACGTTGAAC  | 403   | 72         | 70         | 68          | 68          | 70          | 55           | 53.5749   | 55.6114   | 52.9886   | 47.6839   | 42.5774   | 50.9865    |
| novel-m0076-3p | 22     | AACAGTTTGACTTTGACCAAAG  | 384   | 75         | 60         | 75          | 57          | 69          | 48           | 55.8072   | 47.6669   | 58.4433   | 39.9703   | 41.9691   | 44.4973    |
| novel-m0373-5p | 23     | TTTCTAAACATGTTGACCGTT   | 384   | 92         | 55         | 72          | 57          | 61          | 47           | 68.4569   | 43.6947   | 56.1056   | 39.9703   | 37.1032   | 43.5703    |
| novel-m0554-5p | 23     | TTTCTAAACATGTTGACCGTT   | 381   | 92         | 55         | 72          | 56          | 59          | 47           | 68.4569   | 43.6947   | 56.1056   | 39.2691   | 35.8867   | 43.5703    |
| novel-m0453-5p | 23     | CTTTCTAAACATGTTGACCGT   | 381   | 92         | 55         | 72          | 56          | 59          | 47           | 68.4569   | 43.6947   | 56.1056   | 39.2691   | 35.8867   | 43.5703    |
| novel-m0156-5p | 23     | TTTCTAAACATGTTGACCGTT   | 381   | 92         | 55         | 72          | 56          | 59          | 47           | 68.4569   | 43.6947   | 56.1056   | 39.2691   | 35.8867   | 43.5703    |
| novel-m0030-5p | 20     | CAATTCTACGGTCTTGAGG     | 343   | 59         | 50         | 72          | 74          | 54          | 34           | 43.9017   | 39.7225   | 56.1056   | 51.8913   | 32.8454   | 31.519     |
| novel-m0261-3p | 23     | AACGGTGTCAAGTATTAGGAAC  | 342   | 43         | 55         | 37          | 67          | 93          | 47           | 31.9961   | 43.6947   | 28.832    | 46.9827   | 56.5671   | 43.5703    |
| novel-m0338-5p | 23     | TTTCTAAACATGTTGACCGTT   | 335   | 80         | 51         | 60          | 51          | 53          | 40           | 59.5277   | 40.5169   | 46.7546   | 35.7629   | 32.2372   | 37.0811    |
| novel-m0466-3p | 23     | AAGTAGTTGACTTTGACCAAAG  | 332   | 62         | 54         | 61          | 48          | 45          | 62           | 46.134    | 42.9002   | 47.5339   | 33.6592   | 27.3712   | 57.4757    |
| novel-m0553-3p | 21     | ACGAATCTCAGCCGTTGGATT   | 329   | 47         | 56         | 58          | 47          | 79          | 42           | 34.9725   | 44.4891   | 45.1962   | 32.958    | 48.0516   | 38.9352    |
| novel-m0532-5p | 21     | ATTCGTTACTTCACTCAGCAG   | 326   | 48         | 59         | 84          | 59          | 35          | 41           | 35.7166   | 46.8725   | 65.4565   | 41.3728   | 21.2887   | 38.0082    |
| novel-m0531-3p | 21     | ACGAATCTCAGCCGTTGGATT   | 326   | 47         | 57         | 58          | 44          | 80          | 40           | 34.9725   | 45.2836   | 45.1962   | 30.8543   | 48.6599   | 37.0811    |
| novel-m0405-5p | 21     | CCGGCTCGGCTCAGCCTGC     | 322   | 59         | 64         | 33          | 64          | 64          | 38           | 43.9017   | 50.8447   | 25.7151   | 44.879    | 38.9279   | 35.2271    |
| novel-m0274-3p | 23     | GAAGTGGAGTTGGGAGTGCCT   | 287   | 68         | 42         | 48          | 45          | 48          | 36           | 50.5986   | 33.3669   | 37.4037   | 31.5555   | 29.1959   | 33.373     |
| novel-m0439-3p | 23     | TCAAGGACCGTAAAATTGCTCTT | 273   | 44         | 58         | 45          | 37          | 37          | 52           | 32.7402   | 46.078    | 35.066    | 25.9456   | 22.5052   | 48.2055    |
| novel-m0041-3p | 23     | GAAGTGGAGTTGGGAGTGCCT   | 267   | 65         | 35         | 47          | 43          | 42          | 35           | 48.3663   | 27.8057   | 36.6245   | 30.1531   | 25.5464   | 32.446     |
| novel-m0212-3p | 21     | TATAGTAATGATGAAATGCT    | 249   | 32         | 27         | 50          | 32          | 53          | 55           | 23.8111   | 21.4501   | 38.9622   | 22.4395   | 32.2372   | 50.9865    |
| novel-m0342-3p | 23     | TTTCCATGTCCAACCTTGACTGT | 244   | 48         | 44         | 34          | 45          | 42          | 31           | 35.7166   | 34.9558   | 26.4943   | 31.5555   | 25.5464   | 28.7379    |
| novel-m0542-3p | 23     | TCAAGGACCGTAAAATTGCTCTT | 241   | 44         | 46         | 35          | 34          | 34          | 48           | 32.7402   | 36.5447   | 27.2735   | 23.8419   | 20.6804   | 44.4973    |
| novel-m0315-5p | 21     | TAGTTTACTTTGGATCACCC    | 239   | 36         | 62         | 31          | 39          | 42          | 29           | 26.7875   | 49.2558   | 24.1566   | 27.3481   | 25.5464   | 26.8838    |
| novel-m0490-5p | 20     | AACGAAGTTGAGTTGAAC      | 237   | 22         | 34         | 53          | 37          | 38          | 53           | 16.3701   | 27.0113   | 41.2999   | 25.9456   | 23.1134   | 49.1325    |
| novel-m0055-3p | 21     | AGCGCCACGTCGTCGGTCAGC   | 211   | 35         | 34         | 27          | 44          | 38          | 33           | 26.0434   | 27.0113   | 21.0396   | 30.8543   | 23.1134   | 30.5919    |
| novel-m0211-3p | 23     | ATAGATTTGATGCCAGCTATAGC | 210   | 40         | 39         | 38          | 31          | 30          | 32           | 29.7639   | 30.9835   | 29.6113   | 21.7382   | 18.2475   | 29.6649    |
| novel-m0520-3p | 22     | TTAATGATGACGACGTTGACT   | 200   | 33         | 37         | 35          | 31          | 25          | 39           | 24.5552   | 29.3946   | 27.2735   | 21.7382   | 15.2062   | 36.1541    |
| novel-m0264-3p | 22     | TTAATTCATTGATTGTTTTCAG  | 198   | 32         | 30         | 39          | 26          | 29          | 42           | 23.8111   | 23.8335   | 30.3905   | 18.2321   | 17.6392   | 38.9352    |
| novel-m0254-3p | 22     | AAAATGCTAATCTGAGGCCAGC  | 195   | 45         | 25         | 32          | 41          | 19          | 33           | 33.4843   | 19.8612   | 24.9358   | 28.7506   | 11.5567   | 30.5919    |
| novel-m0327-3p | 22     | TTGGTGCATCCGTTCTCTCT    | 191   | 40         | 48         | 23          | 21          | 24          | 35           | 29.7639   | 38.1336   | 17.9226   | 14.7259   | 14.598    | 32.446     |
| novel-m0321-5p | 23     | TGAGGGCTAGAGCCTGCCTCTGG | 191   | 40         | 45         | 5           | 66          | 27          | 8            | 29.7639   | 35.7502   | 3.8962    | 46.2814   | 16.4227   | 7.4162     |
| novel-m0101-5p | 23     | TTTGACACCGTTGACTTTTAGA  | 191   | 41         | 32         | 13          | 29          | 49          | 27           | 30.5079   | 25.4224   | 10.1302   | 20.3358   | 29.8042   | 25.0298    |
| novel-m0059-5p | 24     | GTTCCGTTGCTCAACATTGACTG | 191   | 40         | 41         | 24          | 36          | 28          | 22           | 29.7639   | 32.5724   | 18.7019   | 25.2444   | 17.031    | 20.3946    |
| novel-m0509-3p | 21     | ACTATGGTGCACCTAAAATG    | 190   | 33         | 35         | 28          | 23          | 40          | 31           | 24.5552   | 27.8057   | 21.8188   | 16.1284   | 24.3299   | 28.7379    |
| novel-m0367-3p | 23     | TCAAACGTTGGACACGGAACCT  | 188   | 44         | 30         | 24          | 35          | 26          | 29           | 32.7402   | 23.8335   | 18.7019   | 24.5432   | 15.8145   | 26.8838    |
| novel-m0283-5p | 22     | TTTTTACTTGTAAACGTTGACC  | 180   | 31         | 37         | 35          | 25          | 29          | 23           | 23.067    | 29.3946   | 27.2735   | 17.5308   | 17.6392   | 21.3216    |
| novel-m0182-5p | 22     | TTTTTACTTACAACGTTTGACC  | 177   | 35         | 29         | 40          | 24          | 22          | 27           | 26.0434   | 23.039    | 31.1698   | 16.8296   | 13.3815   | 25.0298    |
| novel-m0448-3p | 23     | TTGGATTGAAGCCAAAACGCCCT | 168   | 39         | 27         | 27          | 26          | 22          | 22           | 29.0198   | 21.4501   | 21.0396   | 18.9333   | 15.8145   | 20.3946    |
| novel-m0406-3p | 21     | TTAAGGACCGTAAAATTGCTC   | 167   | 21         | 31         | 34          | 31          | 19          | 31           | 15.626    | 24.6279   | 26.4943   | 21.7382   | 11.5567   | 28.7379    |
| novel-m0157-5p | 22     | TCTAGTACAATGAATTTGGAC   | 165   | 30         | 32         | 21          | 30          | 25          | 27           | 22.3229   | 25.4224   | 16.3641   | 21.037    | 15.2062   | 25.0298    |
| novel-m0171-5p | 21     | TTTGAGGAGGTACCATGAGGT   | 165   | 39         | 30         | 17          | 35          | 29          | 15           | 29.0198   | 23.8335   | 13.2471   | 24.5432   | 17.6392   | 13.9054    |
| novel-m0249-3p | 21     | TTCAGATCTGATGATTATGA    | 160   | 26         | 26         | 42          | 16          | 18          | 32           | 19.3465   | 20.6557   | 32.7283   | 11.2197   | 10.9485   | 29.6649    |
| novel-m0084-5p | 22     | TTCCGATCCAACGTTTGACT    | 160   | 20         | 28         | 37          | 21          | 20          | 34           | 14.8819   | 22.2446   | 28.832    | 14.7259   | 12.165    | 31.519     |
| novel-m0550-5p | 22     | TTCCGATCCAACGTTTGACT    | 160   | 20         | 28         | 37          | 21          | 20          | 34           | 14.8819   | 22.2446   | 28.832    | 14.7259   | 12.165    | 31.519     |

|                |    |                         |     |    |    |    |    |    |    |         |         |         |         |         |         |
|----------------|----|-------------------------|-----|----|----|----|----|----|----|---------|---------|---------|---------|---------|---------|
| novel-m0450-3p | 23 | TAGTTATTTGCCACACTAAAAG  | 150 | 24 | 33 | 27 | 12 | 14 | 40 | 17.8583 | 26.2168 | 21.0396 | 8.4148  | 8.5155  | 37.0811 |
| novel-m0447-5p | 21 | GTCACGGCGGGCGGAGCCTC    | 148 | 27 | 20 | 12 | 36 | 34 | 19 | 20.0906 | 15.889  | 9.3509  | 25.2444 | 20.6804 | 17.6135 |
| novel-m0371-3p | 22 | TCAAACGTTGGACACGGATATC  | 147 | 31 | 34 | 27 | 18 | 19 | 18 | 23.067  | 27.0113 | 21.0396 | 12.6222 | 11.5567 | 16.6865 |
| novel-m0322-3p | 24 | CAGATTCGTAGTCTAGGATGTGT | 146 | 20 | 29 | 42 | 18 | 19 | 18 | 14.8819 | 23.039  | 32.7283 | 12.6222 | 11.5567 | 16.6865 |
| novel-m0420-3p | 21 | TCGTCATCGCCTTGTCGGAGG   | 146 | 19 | 30 | 17 | 21 | 33 | 26 | 14.1378 | 23.8335 | 13.2471 | 14.7259 | 20.0722 | 24.1027 |
| novel-m0360-3p | 23 | AAACCGGACTAAAGATCGAGCT  | 145 | 27 | 28 | 19 | 33 | 20 | 18 | 20.0906 | 22.2446 | 14.8056 | 23.1407 | 12.165  | 16.6865 |
| novel-m0392-3p | 21 | GTCAAACGTTGGACACGGATA   | 144 | 29 | 34 | 26 | 18 | 19 | 18 | 21.5788 | 27.0113 | 20.2603 | 12.6222 | 11.5567 | 16.6865 |
| novel-m0322-5p | 23 | ACATCCTAGGACATGAATCTGGA | 143 | 22 | 16 | 29 | 21 | 29 | 26 | 16.3701 | 12.7112 | 22.5981 | 14.7259 | 17.6392 | 24.1027 |
| novel-m0052-5p | 22 | TTAATATATGACGCTGTTGACT  | 143 | 34 | 23 | 34 | 22 | 9  | 21 | 25.2993 | 18.2723 | 26.4943 | 15.4271 | 5.4742  | 19.4676 |
| novel-m0328-5p | 22 | TAGGTCAAATTAGTAAGTAACC  | 140 | 24 | 22 | 18 | 22 | 21 | 33 | 17.8583 | 17.4779 | 14.0264 | 15.4271 | 12.7732 | 30.5919 |
| novel-m0302-3p | 21 | TTCAGATTCGTAGTATTATGA   | 136 | 24 | 22 | 36 | 16 | 12 | 26 | 17.8583 | 17.4779 | 28.0528 | 11.2197 | 7.299   | 24.1027 |
| novel-m0496-5p | 21 | TTTGAGGAGGTACCATGAGGT   | 135 | 33 | 25 | 16 | 27 | 24 | 10 | 24.5552 | 19.8612 | 12.4679 | 18.9333 | 14.598  | 9.2703  |
| novel-m0440-5p | 20 | TTTTTATCAACGTTTGACT     | 131 | 19 | 13 | 22 | 33 | 24 | 20 | 14.1378 | 10.3278 | 17.1434 | 23.1407 | 14.598  | 18.5406 |
| novel-m0174-5p | 22 | TTAATATATGACGCTGTTGACT  | 130 | 31 | 21 | 32 | 20 | 8  | 18 | 23.067  | 16.6834 | 24.9358 | 14.0247 | 4.866   | 16.6865 |
| novel-m0533-5p | 23 | TAACCGGACTAAAAATGATCTT  | 128 | 22 | 24 | 22 | 22 | 27 | 11 | 16.3701 | 19.0668 | 17.1434 | 15.4271 | 16.4227 | 10.1973 |
| novel-m0266-5p | 22 | TTAATAGATGACGTTGTTGACT  | 127 | 28 | 35 | 26 | 18 | 13 | 7  | 20.8347 | 27.8057 | 20.2603 | 12.6222 | 7.9072  | 6.4892  |
| novel-m0314-5p | 22 | TTTTTATTGAACTGTTGACC    | 124 | 20 | 22 | 26 | 24 | 17 | 15 | 14.8819 | 17.4779 | 20.2603 | 16.8296 | 10.3402 | 13.9054 |
| novel-m0567-3p | 21 | AGACCAAGGAGAAATTAATC    | 123 | 24 | 21 | 21 | 25 | 13 | 19 | 17.8583 | 16.6834 | 16.3641 | 17.5308 | 7.9072  | 17.6135 |
| novel-m0458-5p | 21 | GTGCGCAATGCTTTCAAGG     | 122 | 25 | 29 | 9  | 36 | 17 | 6  | 18.6024 | 23.039  | 7.0132  | 25.2444 | 10.3402 | 5.5622  |
| novel-m0210-5p | 22 | TTCTAGTACAATGAAATGGAC   | 117 | 25 | 25 | 13 | 17 | 20 | 17 | 18.6024 | 19.8612 | 10.1302 | 11.921  | 12.165  | 15.7595 |
| novel-m0051-3p | 22 | TTAAAACAGTTGACTTTAACC   | 113 | 14 | 15 | 23 | 18 | 24 | 19 | 10.4173 | 11.9167 | 17.9226 | 12.6222 | 14.598  | 17.6135 |
| novel-m0517-3p | 22 | TTAAAACAGTTGACTTTAACC   | 113 | 14 | 15 | 24 | 17 | 24 | 19 | 10.4173 | 11.9167 | 18.7019 | 11.921  | 14.598  | 17.6135 |
| novel-m0309-3p | 21 | AATCGGAAAAGATTTGGTACC   | 109 | 0  | 0  | 0  | 39 | 34 | 36 | 0.01    | 0.01    | 0.01    | 27.3481 | 20.6804 | 33.373  |
| novel-m0144-3p | 22 | TTGCGAGATGTAGAAGTTGATT  | 107 | 14 | 26 | 26 | 14 | 16 | 11 | 10.4173 | 20.6557 | 20.2603 | 9.8173  | 9.732   | 10.1973 |
| novel-m0164-3p | 21 | CTCGCCCGTCGGTCTCCTCC    | 106 | 21 | 19 | 6  | 20 | 31 | 9  | 15.626  | 15.0945 | 4.6755  | 14.0247 | 18.8557 | 8.3433  |
| novel-m0034-3p | 21 | TCAATGCGCACATTAACTG     | 105 | 14 | 15 | 21 | 24 | 19 | 12 | 10.4173 | 11.9167 | 16.3641 | 16.8296 | 11.5567 | 11.1243 |
| novel-m0083-3p | 22 | TTAGAGTAGTTGACTTTGACT   | 103 | 24 | 12 | 19 | 18 | 16 | 14 | 17.8583 | 9.5334  | 14.8056 | 12.6222 | 9.732   | 12.9784 |
| novel-m0364-5p | 22 | TTAATAGATGACGTTGTTGACT  | 102 | 21 | 26 | 23 | 16 | 10 | 6  | 15.626  | 20.6557 | 17.9226 | 11.2197 | 6.0825  | 5.5622  |
| novel-m0252-5p | 21 | CGTTTGACCGTGGTCTGTCT    | 101 | 16 | 22 | 17 | 17 | 16 | 13 | 11.9055 | 17.4779 | 13.2471 | 11.921  | 9.732   | 12.0514 |
| novel-m0024-5p | 21 | CGTTTGACCGTGGTCTGTCT    | 101 | 16 | 22 | 17 | 17 | 16 | 13 | 11.9055 | 17.4779 | 13.2471 | 11.921  | 9.732   | 12.0514 |
| novel-m0062-3p | 22 | CAAAATTTCCATGCATTCGA    | 100 | 15 | 28 | 7  | 12 | 24 | 14 | 11.1614 | 22.2446 | 5.4547  | 8.4148  | 14.598  | 12.9784 |

**Supplemental Table S3. The target prediction of the differently expressed miRNAs in P15-0/PC-0. The blue region represents the 67 potential targets whose expression pattern was the opposite of one of the seven miRNAs.**

| miR-name        | PC-0-co<br>unt | P15-0-c<br>ount | PC-0-TP<br>M | P15-0-T<br>PM | Fold-change (log <sub>2</sub><br>P15-0/PC-0) | P-value     | Sig-label | Gene ID        | Description                                                                                   | PC_0_FPK<br>M | P15_0_FPK<br>M | Log <sub>2</sub><br>(fold-changed) | P-value     | FDR       |
|-----------------|----------------|-----------------|--------------|---------------|----------------------------------------------|-------------|-----------|----------------|-----------------------------------------------------------------------------------------------|---------------|----------------|------------------------------------|-------------|-----------|
| osa-miR531b     | 0              | 16              | 0.01         | 11.2197       | 6.98683254                                   | 3.07E-05    | **        | LOC_Os02g45700 | fringe-related protein, putative, expressed                                                   | 1.4592        | 0.000335491    | -12.08661595                       | 0.494986094 | 1         |
| osa-miR530-5p   | 23             | 67              | 17.1142      | 46.9827       | 1.487976882                                  | 1.14E-05    | **        | LOC_Os04g51400 | zinc finger, C3HC4 type domain containing protein, expressed                                  | 1.45055       | 0.000471833    | -11.58603608                       | 0.494986094 | 1         |
| osa-miR531b     | 0              | 16              | 0.01         | 11.2197       | 6.98683254                                   | 3.07E-05    | **        | LOC_Os03g12360 | trehalose-6-phosphate synthase, putative, expressed                                           | 0.667649      | 0.225714       | -1.564593936                       | 0.494986094 | 1         |
| osa-miR531b     | 0              | 16              | 0.01         | 11.2197       | 6.98683254                                   | 3.07E-05    | **        | LOC_Os05g37640 | expressed protein                                                                             | 0.943922      | 0.327381       | -1.527697053                       | 0.49498641  | 1         |
| osa-miR3979-3p  | 3              | 15              | 2.2323       | 10.5185       | 2.226604058                                  | 0.007563544 | **        | LOC_Os02g58720 | peroxidase precursor, putative, expressed                                                     | 11.7011       | 4.59361        | -1.34894388                        | 0.093202666 | 1         |
| osa-miR531b     | 0              | 16              | 0.01         | 11.2197       | 6.98683254                                   | 3.07E-05    | **        | LOC_Os07g36700 | CSLF1 - cellulose synthase-like family F; beta1,3;1,4 glucan synthase, expressed              | 1.67282       | 0.689292       | -1.279095039                       | 0.621277411 | 1         |
| osa-miR3979-3p  | 3              | 15              | 2.2323       | 10.5185       | 2.226604058                                  | 0.007563544 | **        | LOC_Os02g10150 | bZIP transcription factor, putative, expressed                                                | 3.00232       | 1.38754        | -1.113548392                       | 0.370061833 | 1         |
| osa-miR531b     | 0              | 16              | 0.01         | 11.2197       | 6.98683254                                   | 3.07E-05    | **        | LOC_Os12g35610 | respiratory burst oxidase, putative, expressed                                                | 0.636272      | 0.295081       | -1.108532605                       | 0.49498641  | 1         |
| osa-miR530-5p   | 23             | 67              | 17.1142      | 46.9827       | 1.487976882                                  | 1.14E-05    | **        | LOC_Os07g16600 | expressed protein                                                                             | 0.155713      | 0.075033       | -1.053292249                       | 1           | 1         |
| osa-miR530-5p   | 23             | 67              | 17.1142      | 46.9827       | 1.487976882                                  | 1.14E-05    | **        | LOC_Os02g14990 | zinc finger, C3HC4 type domain containing protein, expressed                                  | 3.24107       | 1.59124        | -1.026318732                       | 0.684429373 | 1         |
| osa-miR1846d-3p | 6              | 17              | 4.4646       | 11.921        | 1.434409235                                  | 0.034791993 | *         | LOC_Os07g38830 | hydrolase, alpha/beta fold family domain containing protein, expressed                        | 1.467799082   | 1.2173141      | -0.987496715                       | 2.74118     | 1.7073269 |
| osa-miR531b     | 0              | 16              | 0.01         | 11.2197       | 6.98683254                                   | 3.07E-05    | **        | LOC_Os01g40640 | S1 RNA binding domain containing protein, expressed                                           | 10.3194       | 5.35442        | -0.946556877                       | 0.205840628 | 1         |
| osa-miR1846d-3p | 6              | 17              | 4.4646       | 11.921        | 1.434409235                                  | 0.034791993 | *         | LOC_Os02g22260 | fruit protein PKIWI502, putative, expressed                                                   | 0.615274      | 0.810465       | -0.788427493                       | 1.13892     | 1.63937   |
| osa-miR531b     | 0              | 16              | 0.01         | 11.2197       | 6.98683254                                   | 3.07E-05    | **        | LOC_Os08g41670 | uncharacterized protein family UPF0016 domain containing protein, expressed                   | 2.04421       | 1.22554        | -0.738125838                       | 0.621277411 | 1         |
| osa-miR531b     | 0              | 16              | 0.01         | 11.2197       | 6.98683254                                   | 3.07E-05    | **        | LOC_Os11g20160 | O-methyltransferase, putative, expressed                                                      | 2.37086       | 1.43494        | -0.72442006                        | 0.621277643 | 1         |
| osa-miR531b     | 0              | 16              | 0.01         | 11.2197       | 6.98683254                                   | 3.07E-05    | **        | LOC_Os01g02310 | expressed protein                                                                             | 0.103829      | 0.0653722      | -0.667460298                       | 1           | 1         |
| osa-miR531b     | 0              | 16              | 0.01         | 11.2197       | 6.98683254                                   | 3.07E-05    | **        | LOC_Os08g33590 | basic helix-loop-helix, putative, expressed                                                   | 10.6086       | 7.03088        | -0.593457102                       | 0.354829178 | 1         |
| osa-miR3979-3p  | 3              | 15              | 2.2323       | 10.5185       | 2.226604058                                  | 0.007563544 | **        | LOC_Os04g45000 | short-chain dehydrogenase/reductase, putative, expressed                                      | 3.25812       | 2.38206        | -0.451829988                       | 0.684429562 | 1         |
| osa-miR530-5p   | 23             | 67              | 17.1142      | 46.9827       | 1.487976882                                  | 1.14E-05    | **        | LOC_Os04g51400 | zinc finger, C3HC4 type domain containing protein, expressed                                  | 1.39137       | 1.0279         | -0.436806202                       | 1           | 1         |
| osa-miR528-3p   | 21             | 48              | 15.626       | 33.6592       | 1.138446186                                  | 0.002223801 | **        | LOC_Os02g03040 | RNA recognition motif containing protein, expressed                                           | 15.2213       | 11.2758        | -0.432861786                       | 0.438029849 | 1         |
| osa-miR531b     | 0              | 16              | 0.01         | 11.2197       | 6.98683254                                   | 3.07E-05    | **        | LOC_Os06g08470 | expressed protein                                                                             | 28.158436     | 20.930053      | -0.42799124                        | 0.31853837  | 1         |
| osa-miR1846d-3p | 6              | 17              | 4.4646       | 11.921        | 1.434409235                                  | 0.034791993 | *         | LOC_Os07g38830 | hydrolase, alpha/beta fold family domain containing protein, expressed                        | 1.30315       | 2.20035        | -0.408944261                       | 1.96183     | 0.93657   |
| osa-miR3979-3p  | 3              | 15              | 2.2323       | 10.5185       | 2.226604058                                  | 0.007563544 | **        | LOC_Os07g10620 | expressed protein                                                                             | 6.24936       | 4.71192        | -0.407393405                       | 0.772265723 | 1         |
| osa-miR3979-3p  | 3              | 15              | 2.2323       | 10.5185       | 2.226604058                                  | 0.007563544 | **        | LOC_Os02g58720 | peroxidase precursor, putative, expressed                                                     | 1.5785        | 1.19371        | -0.40310187                        | 0.621277411 | 1         |
| osa-miR1846d-3p | 6              | 17              | 4.4646       | 11.921        | 1.434409235                                  | 0.034791993 | *         | LOC_Os06g10920 | xyloglucan fucosyltransferase, putative, expressed                                            | 1.33688       | 0.416729       | -0.373312416                       | 0.702099    | 0.790368  |
| osa-miR1846d-3p | 6              | 17              | 4.4646       | 11.921        | 1.434409235                                  | 0.034791993 | *         | LOC_Os04g54560 | transferase family protein, putative, expressed                                               | 6.44963       | 6.01908        | -0.366075876                       | 4.69582     | 3.85729   |
| osa-miR1846d-3p | 6              | 17              | 4.4646       | 11.921        | 1.434409235                                  | 0.034791993 | *         | LOC_Os01g13720 | expressed protein                                                                             | 1.74886       | 1.06565        | -0.344580218                       | 3.77087     | 1.12813   |
| osa-miR1320-3p  | 1              | 9               | 0.7441       | 6.3111        | 2.973396978                                  | 0.021515144 | *         | LOC_Os08g19610 | peptidyl-prolyl cis-trans isomerase, putative, expressed                                      | 0.722903      | 0.2592098      | -0.344089223                       | 1.02732     | 0.993739  |
| osa-miR3979-3p  | 3              | 15              | 2.2323       | 10.5185       | 2.226604058                                  | 0.007563544 | **        | LOC_Os01g49760 | expressed protein                                                                             | 0.660763      | 0.523176       | -0.336836543                       | 1           | 1         |
| osa-miR531b     | 0              | 16              | 0.01         | 11.2197       | 6.98683254                                   | 3.07E-05    | **        | LOC_Os12g35610 | respiratory burst oxidase, putative, expressed                                                | 1.58136       | 1.274          | -0.31180056                        | 0.621277411 | 1         |
| osa-miR1320-3p  | 1              | 9               | 0.7441       | 6.3111        | 2.973396978                                  | 0.021515144 | *         | LOC_Os08g19610 | peptidyl-prolyl cis-trans isomerase, putative, expressed                                      | 0.255762      | 0.368982       | -0.256987985                       | 0.484112    | 0.221476  |
| osa-miR531b     | 0              | 16              | 0.01         | 11.2197       | 6.98683254                                   | 3.07E-05    | **        | LOC_Os10g01134 | OsSCP46 - Putative Serine Carboxypeptidase homologue, expressed                               | 8.92034       | 7.57744        | -0.235388176                       | 0.812819227 | 1         |
| osa-miR528-3p   | 21             | 48              | 15.626       | 33.6592       | 1.138446186                                  | 0.002223801 | **        | LOC_Os02g07200 | protein-O-fucosyltransferase 1, putative, expressed                                           | 8.30656       | 7.096968       | -0.227048335                       | 0.80178879  | 1         |
| osa-miR1846d-3p | 6              | 17              | 4.4646       | 11.921        | 1.434409235                                  | 0.034791993 | *         | LOC_Os02g49760 | potassium transporter, putative, expressed                                                    | 8.3749        | 2.26657        | -0.213894482                       | 6.7443      | 2.94555   |
| osa-miR531b     | 0              | 16              | 0.01         | 11.2197       | 6.98683254                                   | 3.07E-05    | **        | LOC_Os01g59819 | Os1bglu2 - beta-glucosidase homologue, similar to G. max isohydroxyurate hydrolase, expressed | 43.096505     | 37.33049       | -0.20721643                        | 0.502650398 | 1         |
| osa-miR528-3p   | 21             | 48              | 15.626       | 33.6592       | 1.138446186                                  | 0.002223801 | **        | LOC_Os02g03040 | RNA recognition motif containing protein, expressed                                           | 1.8314        | 1.5959         | -0.198576673                       | 1           | 1         |
| osa-miR531b     | 0              | 16              | 0.01         | 11.2197       | 6.98683254                                   | 3.07E-05    | **        | LOC_Os10g07229 | dehydrogenase, putative, expressed                                                            | 29.0503       | 25.3596        | -0.196021072                       | 0.587302972 | 1         |

|                 |    |    |         |         |             |             |    |                |                                                                                                |             |             |              |             |          |
|-----------------|----|----|---------|---------|-------------|-------------|----|----------------|------------------------------------------------------------------------------------------------|-------------|-------------|--------------|-------------|----------|
| osa-miR1846d-3p | 6  | 17 | 4.4646  | 11.921  | 1.434409235 | 0.034791993 | *  | LOC_Os01g13720 | expressed protein                                                                              | 1.10317     | 1.01739     | -0.192884868 | 2.4068      | 1.65595  |
| osa-miR3979-3p  | 3  | 15 | 2.2323  | 10.5185 | 2.226604058 | 0.007563544 | ** | LOC_Os10g38314 | glutathione S-transferase, N-terminal domain containing protein, expressed                     | 1.31956     | 1.15667     | -0.190079631 | 1           | 1        |
| osa-miR1846d-3p | 6  | 17 | 4.4646  | 11.921  | 1.434409235 | 0.034791993 | *  | LOC_Os01g05810 | gamma-glutamyltranspeptidase 1 precursor, putative, expressed                                  | 21.81269    | 16.31241    | -0.188642639 | 21.30055    | 14.57073 |
| osa-miR531b     | 0  | 16 | 0.01    | 11.2197 | 6.98683254  | 3.07E-05    | ** | LOC_Os09g03750 | ankyrin, putative, expressed                                                                   | 3.627117    | 3.196418271 | -0.182367077 | 0.723903288 | 1        |
| osa-miR531b     | 0  | 16 | 0.01    | 11.2197 | 6.98683254  | 3.07E-05    | ** | LOC_Os04g21340 | expressed protein                                                                              | 1.116161    | 0.9940272   | -0.167187908 | 1           | 1        |
| osa-miR1846d-3p | 6  | 17 | 4.4646  | 11.921  | 1.434409235 | 0.034791993 | *  | LOC_Os01g61940 | white-brown complex homolog protein, putative, expressed                                       | 9.07698     | 9.14711     | -0.163849833 | 14.4821     | 7.97644  |
| osa-miR531b     | 0  | 16 | 0.01    | 11.2197 | 6.98683254  | 3.07E-05    | ** | LOC_Os04g33290 | cysteine protease, putative, expressed                                                         | 2.03448     | 1.83637     | -0.147803329 | 1           | 1        |
| osa-miR1846d-3p | 6  | 17 | 4.4646  | 11.921  | 1.434409235 | 0.034791993 | *  | LOC_Os02g49760 | potassium transporter, putative, expressed                                                     | 11.6092     | 14.9919     | -0.136302784 | 13.9797     | 13.4903  |
| osa-miR530-5p   | 23 | 67 | 17.1142 | 46.9827 | 1.487976882 | 1.14E-05    | ** | LOC_Os04g40300 | lipase class 3 family protein, putative, expressed                                             | 4.784156    | 4.353923    | -0.13594854  | 0.751537927 | 1        |
| osa-miR531b     | 0  | 16 | 0.01    | 11.2197 | 6.98683254  | 3.07E-05    | ** | LOC_Os02g51570 | peptidyl-prolyl cis-trans isomerase, FKBP-type, putative, expressed                            | 58.68281    | 54.06921    | -0.118130678 | 0.573866077 | 1        |
| osa-miR1846d-3p | 6  | 17 | 4.4646  | 11.921  | 1.434409235 | 0.034791993 | *  | LOC_Os01g49410 | expressed protein                                                                              | 20.4767     | 19.5374     | -0.101113971 | 14.2479     | 15.3003  |
| osa-miR531b     | 0  | 16 | 0.01    | 11.2197 | 6.98683254  | 3.07E-05    | ** | LOC_Os01g04300 | glycosyl hydrolase family 10 protein, putative, expressed                                      | 32.2872     | 30.1456     | -0.099014889 | 0.799946519 | 1        |
| osa-miR530-5p   | 23 | 67 | 17.1142 | 46.9827 | 1.487976882 | 1.14E-05    | ** | LOC_Os03g52840 | serine hydroxymethyltransferase, mitochondrial precursor, putative, expressed                  | 208.181     | 194.566     | -0.09757878  | 0.397562517 | 1        |
| osa-miR3979-3p  | 3  | 15 | 2.2323  | 10.5185 | 2.226604058 | 0.007563544 | ** | LOC_Os01g56330 | TKL_IRAK_CrRLK1L-1.5 - The CrRLK1L-1 subfamily has homology to the CrRLK1L homolog, expressed  | 44.8441     | 41.9676     | -0.095642224 | 0.747943467 | 1        |
| osa-miR530-5p   | 23 | 67 | 17.1142 | 46.9827 | 1.487976882 | 1.14E-05    | ** | LOC_Os07g05010 | helix-loop-helix DNA-binding domain containing protein, expressed                              | 9.36105     | 8.77234     | -0.093708632 | 1           | 1        |
| osa-miR528-3p   | 21 | 48 | 15.626  | 33.6592 | 1.138446186 | 0.002223801 | ** | LOC_Os09g13820 | pollen signalling protein with adenyl cyclase activity, putative, expressed                    | 0.97952     | 0.919529    | -0.091179875 | 1           | 1        |
| osa-miR528-3p   | 21 | 48 | 15.626  | 33.6592 | 1.138446186 | 0.002223801 | ** | LOC_Os02g03040 | RNA recognition motif containing protein, expressed                                            | 29.8992     | 28.2883     | -0.079901404 | 0.793400446 | 1        |
| osa-miR1320-3p  | 1  | 9  | 0.7441  | 6.3111  | 2.973396978 | 0.021515144 | *  | LOC_Os08g19610 | peptidyl-prolyl cis-trans isomerase, putative, expressed                                       | 0.583676    | 0.967072    | -0.075026529 | 0.348197    | 0.40864  |
| osa-miR529b     | 32 | 71 | 23.8111 | 49.7876 | 1.097200205 | 0.000352974 | ** | LOC_Os05g49520 | CTP synthase, putative, expressed                                                              | 0.0295927   | 0.0281345   | -0.072901008 | 1           | 1        |
| osa-miR531b     | 0  | 16 | 0.01    | 11.2197 | 6.98683254  | 3.07E-05    | ** | LOC_Os12g13300 | expressed protein                                                                              | 12.208      | 11.6461     | -0.067979956 | 1           | 1        |
| osa-miR1846d-3p | 6  | 17 | 4.4646  | 11.921  | 1.434409235 | 0.034791993 | *  | LOC_Os06g05980 | transporter family protein, putative, expressed                                                | 8.8795      | 10.9304     | -0.06753557  | 12.2296     | 8.75929  |
| osa-miR3979-3p  | 3  | 15 | 2.2323  | 10.5185 | 2.226604058 | 0.007563544 | ** | LOC_Os10g42610 | expressed protein                                                                              | 10.8628     | 10.3894     | -0.064283681 | 0.830295071 | 1        |
| osa-miR531b     | 0  | 16 | 0.01    | 11.2197 | 6.98683254  | 3.07E-05    | ** | LOC_Os09g34250 | UDP-glucuronosyl and UDP-glucosyl transferase domain containing protein, expressed             | 2.23158     | 2.14668     | -0.055958378 | 1           | 1        |
| osa-miR531b     | 0  | 16 | 0.01    | 11.2197 | 6.98683254  | 3.07E-05    | ** | LOC_Os01g52214 | ubiquinone oxidoreductase, putative, expressed                                                 | 121.106     | 116.818     | -0.052007753 | 0.697603169 | 1        |
| osa-miR3979-3p  | 3  | 15 | 2.2323  | 10.5185 | 2.226604058 | 0.007563544 | ** | LOC_Os10g42610 | expressed protein                                                                              | 1.50233     | 1.46114     | -0.040107331 | 0.62127788  | 1        |
| osa-miR1846d-3p | 6  | 17 | 4.4646  | 11.921  | 1.434409235 | 0.034791993 | *  | LOC_Os01g54440 | expressed protein                                                                              | 2.43813     | 3.11467     | -0.039746641 | 2.44202     | 1.97411  |
| osa-miR531b     | 0  | 16 | 0.01    | 11.2197 | 6.98683254  | 3.07E-05    | ** | LOC_Os01g13740 | myb-like DNA-binding domain containing protein, expressed                                      | 39.9172     | 39.77664    | -0.005089112 | 1           | 1        |
| osa-miR1320-3p  | 1  | 9  | 0.7441  | 6.3111  | 2.973396978 | 0.021515144 | *  | LOC_Os08g19610 | peptidyl-prolyl cis-trans isomerase, putative, expressed                                       | 14.488      | 15.0906     | -0.003915863 | 13.023      | 17.8689  |
| osa-miR1846d-3p | 6  | 17 | 4.4646  | 11.921  | 1.434409235 | 0.034791993 | *  | LOC_Os03g07340 | ribosomal L18p/L5e family protein, putative, expressed                                         | 7.32623     | 7.546078    | -0.002039052 | 8.54666     | 9.283562 |
| osa-miR3979-3p  | 3  | 15 | 2.2323  | 10.5185 | 2.226604058 | 0.007563544 | ** | LOC_Os11g43970 | AAA-type ATPase family protein, putative, expressed                                            | 32.8971     | 32.8614     | -0.001566466 | 1           | 1        |
| osa-miR531b     | 0  | 16 | 0.01    | 11.2197 | 6.98683254  | 3.07E-05    | ** | LOC_Os07g04520 | protein kinase, putative, expressed                                                            | 0.000394635 | 0           | -Inf         | 1           | 1        |
| osa-miR531b     | 0  | 16 | 0.01    | 11.2197 | 6.98683254  | 3.07E-05    | ** | LOC_Os09g33690 | Os9bglu32 - beta-glucosidase homologue, similar to G. max hydroxyisourate hydrolase, expressed | 0.967041    | 0           | -Inf         | 0.494986094 | 1        |
| osa-miR3979-3p  | 3  | 15 | 2.2323  | 10.5185 | 2.226604058 | 0.007563544 | ** | LOC_Os03g42780 | zinc finger protein-related, putative, expressed                                               | 0.0158732   | 0           | -Inf         | 1           | 1        |
| osa-miR3979-3p  | 3  | 15 | 2.2323  | 10.5185 | 2.226604058 | 0.007563544 | ** | LOC_Os05g29800 | expressed protein                                                                              | 0.000619013 | 0           | -Inf         | 1           | 1        |
| osa-miR3979-3p  | 3  | 15 | 2.2323  | 10.5185 | 2.226604058 | 0.007563544 | ** | LOC_Os06g49380 | NBS-LRR disease resistance protein, putative, expressed                                        | 0.0926166   | 0           | -Inf         | 1           | 1        |
| osa-miR3979-3p  | 3  | 15 | 2.2323  | 10.5185 | 2.226604058 | 0.007563544 | ** | LOC_Os06g49380 | NBS-LRR disease resistance protein, putative, expressed                                        | 2.46E-05    | 0           | -Inf         | 1           | 1        |
| osa-miR530-5p   | 23 | 67 | 17.1142 | 46.9827 | 1.487976882 | 1.14E-05    | ** | LOC_Os03g52840 | serine hydroxymethyltransferase, mitochondrial precursor, putative, expressed                  | 0.180402    | 0           | -Inf         | 1           | 1        |
| osa-miR1846d-3p | 6  | 17 | 4.4646  | 11.921  | 1.434409235 | 0.034791993 | *  | LOC_Os01g13720 | expressed protein                                                                              | 0.536291    | 0.389927    | -Inf         | 1.49231     | 0.75597  |
| osa-miR1846d-3p | 6  | 17 | 4.4646  | 11.921  | 1.434409235 | 0.034791993 | *  | LOC_Os03g62670 | expressed protein                                                                              | 3.24E-05    | 0           | -Inf         | 0.2084      | 0        |
| osa-miR1846d-3p | 6  | 17 | 4.4646  | 11.921  | 1.434409235 | 0.034791993 | *  | LOC_Os09g26770 | ribosomal L18p/L5e family protein, putative, expressed                                         | 0           | 0           | -Inf         | 0.271759    | 0.396614 |

|                 |     |    |          |         |              |             |    |                |                                                                                                      |             |             |              |             |            |
|-----------------|-----|----|----------|---------|--------------|-------------|----|----------------|------------------------------------------------------------------------------------------------------|-------------|-------------|--------------|-------------|------------|
| osa-miR1846d-3p | 6   | 17 | 4.4646   | 11.921  | 1.434409235  | 0.034791993 | *  | LOC_Os06g10260 | cytochrome P450, putative, expressed                                                                 | 0           | 0.340431    | -Inf         | 0.286402    | 0          |
| osa-miR167a-3p  | 172 | 80 | 127.9846 | 56.0987 | -1.152675764 | 1.26E-09    | ** | LOC_Os03g58260 | indole-3-glycerol phosphate lyase, chloroplast precursor, putative, expressed                        | 0.400844    | 0.2155557   | -0.894980167 | 1           | 1          |
| osa-miR167a-3p  | 172 | 80 | 127.9846 | 56.0987 | -1.152675764 | 1.26E-09    | ** | LOC_Os03g58260 | indole-3-glycerol phosphate lyase, chloroplast precursor, putative, expressed                        | 5.94458     | 5.10455     | -0.2197911   | 0.772265723 | 1          |
| osa-miR3979-3p  | 3   | 15 | 2.2323   | 10.5185 | 2.226604058  | 0.007563544 | ** | LOC_Os04g54900 | bHLH family protein, putative, expressed                                                             | 6.00621     | 6.02257     | 0.003924339  | 1           | 1          |
| osa-miR529b     | 32  | 71 | 23.8111  | 49.7876 | 1.097200205  | 0.000352974 | ** | LOC_Os01g03950 | glycosyl hydrolase, family 31, putative, expressed                                                   | 15.0337     | 15.0778     | 0.00422582   | 1           | 1          |
| osa-miR1846d-3p | 6   | 17 | 4.4646   | 11.921  | 1.434409235  | 0.034791993 | *  | LOC_Os05g38000 | ATROPGEF7/ROPGEF7, putative, expressed                                                               | 58.5492     | 76.2295     | 0.024077534  | 86.688      | 94.1303    |
| osa-miR530-5p   | 23  | 67 | 17.1142  | 46.9827 | 1.487976882  | 1.14E-05    | ** | LOC_Os06g36990 | phospholipid-transporting ATPase 4, putative, expressed                                              | 14.28371    | 14.55304    | 0.026949802  | 1           | 1          |
| osa-miR3979-3p  | 3   | 15 | 2.2323   | 10.5185 | 2.226604058  | 0.007563544 | ** | LOC_Os02g58720 | peroxidase precursor, putative, expressed                                                            | 76.5106     | 78.0807     | 0.02930635   | 1           | 1          |
| osa-miR528-3p   | 21  | 48 | 15.626   | 33.6592 | 1.138446186  | 0.002223801 | ** | LOC_Os02g08140 | CAMK_KIN1/SNF1/Nim1_like. 14 - CAMK includes calcium/calmodulin dependent protein kinases, expressed | 5.068278    | 5.178954    | 0.031165084  | 1           | 1          |
| osa-miR530-5p   | 23  | 67 | 17.1142  | 46.9827 | 1.487976882  | 1.14E-05    | ** | LOC_Os07g05010 | helix-loop-helix DNA-binding domain containing protein, expressed                                    | 4.42535     | 4.52595     | 0.032429085  | 1           | 1          |
| osa-miR1846d-3p | 6   | 17 | 4.4646   | 11.921  | 1.434409235  | 0.034791993 | *  | LOC_Os02g22260 | fruit protein PKIW1502, putative, expressed                                                          | 52.2703     | 89.6217     | 0.041383099  | 126.392     | 119.312    |
| osa-miR531b     | 0   | 16 | 0.01     | 11.2197 | 6.98683254   | 3.07E-05    | ** | LOC_Os09g36990 | expressed protein                                                                                    | 65.699      | 67.6636     | 0.042508525  | 1           | 1          |
| osa-miR3979-3p  | 3   | 15 | 2.2323   | 10.5185 | 2.226604058  | 0.007563544 | ** | LOC_Os05g13780 | C-5 cytosine-specific DNA methylase, putative, expressed                                             | 14.90328    | 15.425762   | 0.049711875  | 1           | 1          |
| osa-miR3979-3p  | 3   | 15 | 2.2323   | 10.5185 | 2.226604058  | 0.007563544 | ** | LOC_Os01g49760 | expressed protein                                                                                    | 6.06851     | 6.30118     | 0.054279687  | 1           | 1          |
| osa-miR3979-3p  | 3   | 15 | 2.2323   | 10.5185 | 2.226604058  | 0.007563544 | ** | LOC_Os03g44780 | elongation factor Tu family protein, putative, expressed                                             | 2.0618      | 2.15318     | 0.062564536  | 1           | 1          |
| osa-miR1846d-3p | 6   | 17 | 4.4646   | 11.921  | 1.434409235  | 0.034791993 | *  | LOC_Os11g40510 | RNA recognition motif containing protein, putative, expressed                                        | 103.879     | 85.5242     | 0.063289445  | 66.7516     | 101.594    |
| osa-miR3979-3p  | 3   | 15 | 2.2323   | 10.5185 | 2.226604058  | 0.007563544 | ** | LOC_Os01g63880 | expressed protein                                                                                    | 15.37502001 | 16.14152    | 0.070188152  | 1           | 1          |
| osa-miR530-5p   | 23  | 67 | 17.1142  | 46.9827 | 1.487976882  | 1.14E-05    | ** | LOC_Os07g08430 | indole-3-glycerol phosphate lyase, chloroplast precursor, putative, expressed                        | 19.1507     | 20.2431     | 0.080033112  | 1           | 1          |
| osa-miR531b     | 0   | 16 | 0.01     | 11.2197 | 6.98683254   | 3.07E-05    | ** | LOC_Os10g34420 | lysM domain containing protein, putative, expressed                                                  | 4.33108     | 4.583242    | 0.081641643  | 1           | 1          |
| osa-miR3979-3p  | 3   | 15 | 2.2323   | 10.5185 | 2.226604058  | 0.007563544 | ** | LOC_Os04g45000 | short-chain dehydrogenase/reductase, putative, expressed                                             | 4.84861     | 5.23018     | 0.109289384  | 1           | 1          |
| osa-miR531b     | 0   | 16 | 0.01     | 11.2197 | 6.98683254   | 3.07E-05    | ** | LOC_Os03g12360 | trehalose-6-phosphate synthase, putative, expressed                                                  | 24.4038     | 26.3439     | 0.110363128  | 0.888004923 | 1          |
| osa-miR3979-3p  | 3   | 15 | 2.2323   | 10.5185 | 2.226604058  | 0.007563544 | ** | LOC_Os01g32880 | AP-3 complex subunit delta, putative, expressed                                                      | 5.84578     | 6.31549     | 0.111499137  | 1           | 1          |
| osa-miR1846d-3p | 6   | 17 | 4.4646   | 11.921  | 1.434409235  | 0.034791993 | *  | LOC_Os06g50960 | expansin precursor, putative, expressed                                                              | 7.989359333 | 14.62024    | 0.111728527  | 12.447297   | 9.692248   |
| osa-miR530-5p   | 23  | 67 | 17.1142  | 46.9827 | 1.487976882  | 1.14E-05    | ** | LOC_Os04g51400 | zinc finger, C3HC4 type domain containing protein, expressed                                         | 10.49158    | 11.39744    | 0.119477855  | 1           | 1          |
| osa-miR531b     | 0   | 16 | 0.01     | 11.2197 | 6.98683254   | 3.07E-05    | ** | LOC_Os05g49940 | expressed protein                                                                                    | 2.49441     | 2.71316     | 0.121275512  | 1           | 1          |
| osa-miR531b     | 0   | 16 | 0.01     | 11.2197 | 6.98683254   | 3.07E-05    | ** | LOC_Os01g08220 | gibberellin 3-beta-dioxygenase 2-2, putative, expressed                                              | 9.13775     | 9.96106     | 0.124460302  | 1           | 1          |
| osa-miR531b     | 0   | 16 | 0.01     | 11.2197 | 6.98683254   | 3.07E-05    | ** | LOC_Os03g58010 | acetyltransferase, GNAT family, putative, expressed                                                  | 1.07437     | 1.17288     | 0.12656449   | 1           | 1          |
| osa-miR530-5p   | 23  | 67 | 17.1142  | 46.9827 | 1.487976882  | 1.14E-05    | ** | LOC_Os04g56980 | SWIB/MDM2 domain containing protein, expressed                                                       | 16.5527     | 18.2219     | 0.138606835  | 1           | 1          |
| osa-miR1846d-3p | 6   | 17 | 4.4646   | 11.921  | 1.434409235  | 0.034791993 | *  | LOC_Os02g49800 | eukaryotic aspartyl protease domain containing protein, expressed                                    | 48.0694     | 42.81       | 0.140898302  | 33.1129     | 38.1874    |
| osa-miR528-3p   | 21  | 48 | 15.626   | 33.6592 | 1.138446186  | 0.002223801 | ** | LOC_Os02g07200 | protein-O-fucosyltransferase 1, putative, expressed                                                  | 5.6092      | 6.19018     | 0.142186337  | 1           | 1          |
| osa-miR3979-3p  | 3   | 15 | 2.2323   | 10.5185 | 2.226604058  | 0.007563544 | ** | LOC_Os05g43582 | rRNA methyltran, putative, expressed                                                                 | 5.531643    | 6.13736549  | 0.14991145   | 1           | 1          |
| osa-miR1846d-3p | 6   | 17 | 4.4646   | 11.921  | 1.434409235  | 0.034791993 | *  | LOC_Os09g26770 | ribosomal L18p/L5e family protein, putative, expressed                                               | 16.8408408  | 16.57788098 | 0.152967037  | 13.46533027 | 14.0338215 |
| osa-miR531b     | 0   | 16 | 0.01     | 11.2197 | 6.98683254   | 3.07E-05    | ** | LOC_Os03g52760 | kinase, pIKB family, putative, expressed                                                             | 6.39352     | 7.117485    | 0.154757111  | 1           | 1          |
| osa-miR530-5p   | 23  | 67 | 17.1142  | 46.9827 | 1.487976882  | 1.14E-05    | ** | LOC_Os04g51400 | zinc finger, C3HC4 type domain containing protein, expressed                                         | 4.49655     | 5.20961     | 0.212356863  | 1           | 1          |
| osa-miR531b     | 0   | 16 | 0.01     | 11.2197 | 6.98683254   | 3.07E-05    | ** | LOC_Os09g28470 | leucine-rich repeat family protein, putative, expressed                                              | 1.406634    | 1.652159    | 0.232105541  | 1           | 1          |
| osa-miR531b     | 0   | 16 | 0.01     | 11.2197 | 6.98683254   | 3.07E-05    | ** | LOC_Os06g05940 | DTA2, putative, expressed                                                                            | 1.5331      | 1.81575     | 0.244113777  | 1           | 1          |
| osa-miR530-5p   | 23  | 67 | 17.1142  | 46.9827 | 1.487976882  | 1.14E-05    | ** | LOC_Os07g13950 | expressed protein                                                                                    | 11.9548     | 14.26548    | 0.254938297  | 0.845220176 | 1          |
| osa-miR3979-3p  | 3   | 15 | 2.2323   | 10.5185 | 2.226604058  | 0.007563544 | ** | LOC_Os02g54200 | mitochondrial transcription termination factor family protein, putative, expressed                   | 5.970785    | 7.17407017  | 0.264871236  | 1           | 1          |
| osa-miR530-5p   | 23  | 67 | 17.1142  | 46.9827 | 1.487976882  | 1.14E-05    | ** | LOC_Os11g04520 | PP2A regulatory subunit TAP46, putative, expressed                                                   | 1.31051     | 1.57744     | 0.267456769  | 1           | 1          |

|                 |     |     |          |          |             |             |    |                |                                                                                                |             |            |             |             |          |
|-----------------|-----|-----|----------|----------|-------------|-------------|----|----------------|------------------------------------------------------------------------------------------------|-------------|------------|-------------|-------------|----------|
| osa-miR529b     | 32  | 71  | 23.8111  | 49.7876  | 1.097200205 | 0.000352974 | ** | LOC_Os01g69830 | OsSPL2 - SBP-box gene family member, expressed                                                 | 20.5927     | 24.8999    | 0.274006948 | 0.659476779 | 1        |
| osa-miR530-5p   | 23  | 67  | 17.1142  | 46.9827  | 1.487976882 | 1.14E-05    | ** | LOC_Os11g04520 | PP2A regulatory subunit TAP46, putative, expressed                                             | 2.39639     | 2.93049    | 0.290279196 | 1           | 1        |
| osa-miR1846d-3p | 6   | 17  | 4.4646   | 11.921   | 1.434409235 | 0.034791993 | *  | LOC_Os02g49760 | potassium transporter, putative, expressed                                                     | 3.97286     | 7.30414    | 0.291815689 | 5.34169     | 6.06538  |
| osa-miR1846d-3p | 6   | 17  | 4.4646   | 11.921   | 1.434409235 | 0.034791993 | *  | LOC_Os06g05980 | transporter family protein, putative, expressed                                                | 2.26248     | 0.651932   | 0.302887503 | 1.54997     | 1.12193  |
| osa-miR3979-3p  | 3   | 15  | 2.2323   | 10.5185  | 2.226604058 | 0.007563544 | ** | LOC_Os05g38850 | MCM8 - Putative minichromosome maintenance MCM family subunit 8, expressed                     | 0.599133    | 0.742259   | 0.309046382 | 1           | 1        |
| osa-miR1432-5p  | 141 | 336 | 104.9176 | 235.6145 | 1.202455295 | 1.23E-17    | ** | LOC_Os04g35590 | thioesterase family protein, putative, expressed                                               | 13.982      | 17.5442    | 0.327423424 | 0.597206746 | 1        |
| osa-miR531b     | 0   | 16  | 0.01     | 11.2197  | 6.98683254  | 3.07E-05    | ** | LOC_Os09g33970 | expressed protein                                                                              | 3.95079     | 5.02092    | 0.345810575 | 1           | 1        |
| osa-miR528-3p   | 21  | 48  | 15.626   | 33.6592  | 1.138446186 | 0.002223801 | ** | LOC_Os02g03040 | RNA recognition motif containing protein, expressed                                            | 13.33171    | 16.95206   | 0.346598759 | 0.585232725 | 1        |
| osa-miR1846d-3p | 6   | 17  | 4.4646   | 11.921   | 1.434409235 | 0.034791993 | *  | LOC_Os03g62670 | expressed protein                                                                              | 0.330674    | 2.04676    | 0.356229536 | 3.1028      | 0.471074 |
| osa-miR3979-3p  | 3   | 15  | 2.2323   | 10.5185  | 2.226604058 | 0.007563544 | ** | LOC_Os08g32060 | spotted leaf 11, putative, expressed                                                           | 0.200893    | 0.257971   | 0.360781598 | 1           | 1        |
| osa-miR531b     | 0   | 16  | 0.01     | 11.2197  | 6.98683254  | 3.07E-05    | ** | LOC_Os11g04830 | embryogenesis transmembrane protein, putative, expressed                                       | 0.305316    | 0.396264   | 0.376158711 | 1           | 1        |
| osa-miR1846d-3p | 6   | 17  | 4.4646   | 11.921   | 1.434409235 | 0.034791993 | *  | LOC_Os04g40130 | RF1, mitochondrial precursor, putative, expressed                                              | 1.07584     | 1.5228     | 0.383490975 | 1.019       | 1.06386  |
| osa-miR529b     | 32  | 71  | 23.8111  | 49.7876  | 1.097200205 | 0.000352974 | ** | LOC_Os08g39890 | OsSPL14 - SBP-box gene family member, expressed                                                | 3.9919711   | 5.2494246  | 0.395058018 | 1           | 1        |
| osa-miR531b     | 0   | 16  | 0.01     | 11.2197  | 6.98683254  | 3.07E-05    | ** | LOC_Os08g37660 | plastocyanin-like domain containing protein, putative, expressed                               | 0.950486    | 1.25954    | 0.406159657 | 1           | 1        |
| osa-miR531b     | 0   | 16  | 0.01     | 11.2197  | 6.98683254  | 3.07E-05    | ** | LOC_Os12g36210 | inhibitor I family protein, putative, expressed                                                | 13.7952     | 18.4476    | 0.419266764 | 0.597206671 | 1        |
| osa-miR1846d-3p | 6   | 17  | 4.4646   | 11.921   | 1.434409235 | 0.034791993 | *  | LOC_Os02g47810 | dof zinc finger domain containing protein, putative, expressed                                 | 2.61015     | 2.86248    | 0.423981391 | 2.94033     | 2.80897  |
| osa-miR3979-3p  | 3   | 15  | 2.2323   | 10.5185  | 2.226604058 | 0.007563544 | ** | LOC_Os04g45000 | short-chain dehydrogenase/reductase, putative, expressed                                       | 8.00058     | 11.0619    | 0.467422708 | 0.647922668 | 1        |
| osa-miR530-5p   | 23  | 67  | 17.1142  | 46.9827  | 1.487976882 | 1.14E-05    | ** | LOC_Os11g04520 | PP2A regulatory subunit TAP46, putative, expressed                                             | 1.44306     | 2.014763   | 0.481478856 | 1           | 1        |
| osa-miR531b     | 0   | 16  | 0.01     | 11.2197  | 6.98683254  | 3.07E-05    | ** | LOC_Os04g55240 | VQ domain containing protein, putative, expressed                                              | 1.58504     | 2.26578    | 0.515488538 | 1           | 1        |
| osa-miR531b     | 0   | 16  | 0.01     | 11.2197  | 6.98683254  | 3.07E-05    | ** | LOC_Os01g40640 | S1 RNA binding domain containing protein, expressed                                            | 4.1546019   | 6.2156343  | 0.581191382 | 0.754029172 | 1        |
| osa-miR531b     | 0   | 16  | 0.01     | 11.2197  | 6.98683254  | 3.07E-05    | ** | LOC_Os09g33690 | Os9bglu32 - beta-glucosidase homologue, similar to G. max hydroxyisourate hydrolase, expressed | 5.49355     | 8.53642    | 0.635892422 | 0.42427977  | 1        |
| osa-miR531b     | 0   | 16  | 0.01     | 11.2197  | 6.98683254  | 3.07E-05    | ** | LOC_Os01g39970 | protein kinase domain containing protein, putative, expressed                                  | 0.587288    | 0.929869   | 0.662959324 | 1           | 1        |
| osa-miR530-5p   | 23  | 67  | 17.1142  | 46.9827  | 1.487976882 | 1.14E-05    | ** | LOC_Os07g05010 | helix-loop-helix DNA-binding domain containing protein, expressed                              | 2.95864     | 4.69983    | 0.66767441  | 0.72667177  | 1        |
| osa-miR1846d-3p | 6   | 17  | 4.4646   | 11.921   | 1.434409235 | 0.034791993 | *  | LOC_Os09g26760 | DNA repair metallo-beta-lactamase family protein, expressed                                    | 0.716054    | 1.151599   | 0.700295686 | 0.768998    | 1.099533 |
| osa-miR531b     | 0   | 16  | 0.01     | 11.2197  | 6.98683254  | 3.07E-05    | ** | LOC_Os09g20810 | strictosidine synthase, putative, expressed                                                    | 0.628853    | 1.04607    | 0.734184677 | 1           | 1        |
| osa-miR529b     | 32  | 71  | 23.8111  | 49.7876  | 1.097200205 | 0.000352974 | ** | LOC_Os09g31438 | OsSPL17 - SBP-box gene family member, expressed                                                | 3.997693603 | 6.6670873  | 0.737888715 | 0.549053482 | 1        |
| osa-miR531b     | 0   | 16  | 0.01     | 11.2197  | 6.98683254  | 3.07E-05    | ** | LOC_Os11g31090 | transferase family protein, putative, expressed                                                | 36.2125     | 60.5563    | 0.74178928  | 0.014861042 | 1        |
| osa-miR1846d-3p | 6   | 17  | 4.4646   | 11.921   | 1.434409235 | 0.034791993 | *  | LOC_Os02g49760 | potassium transporter, putative, expressed                                                     | 5.394382    | 3.03676335 | 0.765570918 | 2.519778    | 4.83715  |
| osa-miR531b     | 0   | 16  | 0.01     | 11.2197  | 6.98683254  | 3.07E-05    | ** | LOC_Os10g18370 | transcriptional regulator, putative, expressed                                                 | 0.816289    | 1.44931    | 0.828214292 | 1           | 1        |
| osa-miR1846d-3p | 6   | 17  | 4.4646   | 11.921   | 1.434409235 | 0.034791993 | *  | LOC_Os01g13720 | expressed protein                                                                              | 3.3244      | 7.97106    | 0.839304077 | 4.33621     | 7.28489  |
| osa-miR530-5p   | 23  | 67  | 17.1142  | 46.9827  | 1.487976882 | 1.14E-05    | ** | LOC_Os03g52840 | serine hydroxymethyltransferase, mitochondrial precursor, putative, expressed                  | 0.458843    | 0.841412   | 0.874811795 | 1           | 1        |
| osa-miR531b     | 0   | 16  | 0.01     | 11.2197  | 6.98683254  | 3.07E-05    | ** | LOC_Os12g35610 | respiratory burst oxidase, putative, expressed                                                 | 1.61337     | 2.977398   | 0.88397475  | 1           | 1        |
| osa-miR531b     | 0   | 16  | 0.01     | 11.2197  | 6.98683254  | 3.07E-05    | ** | LOC_Os06g05070 | protein kinase domain containing protein, expressed                                            | 0.219397    | 0.572994   | 1.384976233 | 1           | 1        |
| osa-miR531b     | 0   | 16  | 0.01     | 11.2197  | 6.98683254  | 3.07E-05    | ** | LOC_Os09g33690 | Os9bglu32 - beta-glucosidase homologue, similar to G. max hydroxyisourate hydrolase, expressed | 1.264798    | 3.860903   | 1.610031317 | 0.375124892 | 1        |
| osa-miR3979-3p  | 3   | 15  | 2.2323   | 10.5185  | 2.226604058 | 0.007563544 | ** | LOC_Os04g45000 | short-chain dehydrogenase/reductase, putative, expressed                                       | 0.309511    | 1.07549    | 1.796931522 | 1           | 1        |
| osa-miR1846d-3p | 6   | 17  | 4.4646   | 11.921   | 1.434409235 | 0.034791993 | *  | LOC_Os11g40510 | RNA recognition motif containing protein, putative, expressed                                  | 1.08619     | 0.15893    | 2.189064461 | 0.242883    | 0.14515  |

|                 |     |     |          |          |              |             |    |                |                                                                                                               |            |             |             |             |          |
|-----------------|-----|-----|----------|----------|--------------|-------------|----|----------------|---------------------------------------------------------------------------------------------------------------|------------|-------------|-------------|-------------|----------|
| osa-miR1432-5p  | 141 | 336 | 104.9176 | 235.6145 | 1.202455295  | 1.23E-17    | ** | LOC_Os03g59770 | EF hand family protein, putative, expressed                                                                   | 0.230587   | 1.20804     | 2.389285141 | 1           | 1        |
| osa-miR531b     | 0   | 16  | 0.01     | 11.2197  | 6.98683254   | 3.07E-05    | ** | LOC_Os02g45700 | fringe-related protein, putative, expressed                                                                   | 0.25106065 | 1.940791    | 2.950536935 | 0.500049959 | 1        |
| osa-miR1846d-3p | 6   | 17  | 4.4646   | 11.921   | 1.434409235  | 0.034791993 | *  | LOC_Os05g38000 | ATROPGEF7/ROPGEF7, putative, expressed                                                                        | 0.502965   | 1.02354     | 6.45236149  | 0.00551407  | 0.793702 |
| osa-miR531b     | 0   | 16  | 0.01     | 11.2197  | 6.98683254   | 3.07E-05    | ** | LOC_Os01g13740 | myb-like DNA-binding domain containing protein, expressed                                                     | 0.00295567 | 4.68372     | 10.62995391 | 0.062562452 | 1        |
| osa-miR531b     | 0   | 16  | 0.01     | 11.2197  | 6.98683254   | 3.07E-05    | ** | LOC_Os01g16390 | NB-ARC domain containing protein, expressed                                                                   | 0          | 0.000100823 | Inf         | 1           | 1        |
| osa-miR531b     | 0   | 16  | 0.01     | 11.2197  | 6.98683254   | 3.07E-05    | ** | LOC_Os01g40640 | S1 RNA binding domain containing protein, expressed                                                           | 0          | 0.713793    | Inf         | 1           | 1        |
| osa-miR531b     | 0   | 16  | 0.01     | 11.2197  | 6.98683254   | 3.07E-05    | ** | LOC_Os10g01134 | OsSCP46 - Putative Serine Carboxypeptidase homologue, expressed                                               | 0          | 0.575507    | Inf         | 1           | 1        |
| osa-miR3979-3p  | 3   | 15  | 2.2323   | 10.5185  | 2.226604058  | 0.007563544 | ** | LOC_Os06g49380 | NBS-LRR disease resistance protein, putative, expressed                                                       | 0          | 0.0293247   | Inf         | 1           | 1        |
| osa-miR530-5p   | 23  | 67  | 17.1142  | 46.9827  | 1.487976882  | 1.14E-05    | ** | LOC_Os11g47980 | expressed protein                                                                                             | 0          | 0.0876101   | Inf         | 1           | 1        |
| osa-miR1846d-3p | 6   | 17  | 4.4646   | 11.921   | 1.434409235  | 0.034791993 | *  | LOC_Os03g62670 | expressed protein                                                                                             | 0          | 0           | Inf         | 0           | 0        |
| osa-miR1846d-3p | 6   | 17  | 4.4646   | 11.921   | 1.434409235  | 0.034791993 | *  | LOC_Os06g49290 | acanthoscurrin-1 precursor, putative, expressed                                                               | 0.257546   | 0           | Inf         | 0           | 0        |
| osa-miR531b     | 0   | 16  | 0.01     | 11.2197  | 6.98683254   | 3.07E-05    | ** | LOC_Os01g61480 | helix-loop-helix DNA-binding domain containing protein, expressed                                             | 0          | 0           | NA          | 1           | 1        |
| osa-miR531b     | 0   | 16  | 0.01     | 11.2197  | 6.98683254   | 3.07E-05    | ** | LOC_Os04g31710 | expressed protein                                                                                             | 0          | 0           | NA          | 1           | 1        |
| osa-miR531b     | 0   | 16  | 0.01     | 11.2197  | 6.98683254   | 3.07E-05    | ** | LOC_Os05g06100 | E3 ubiquitin-protein ligase SINA-like 2, putative, expressed                                                  | 0          | 0           | NA          | 1           | 1        |
| osa-miR531b     | 0   | 16  | 0.01     | 11.2197  | 6.98683254   | 3.07E-05    | ** | LOC_Os05g18940 | STIGL3 - Stigma-specific Stig1 family protein precursor, putative, expressed                                  | 0          | 0           | NA          | 1           | 1        |
| osa-miR531b     | 0   | 16  | 0.01     | 11.2197  | 6.98683254   | 3.07E-05    | ** | LOC_Os06g01590 | lactate/malate dehydrogenase, putative, expressed                                                             | 0          | 0           | NA          | 1           | 1        |
| osa-miR531b     | 0   | 16  | 0.01     | 11.2197  | 6.98683254   | 3.07E-05    | ** | LOC_Os07g07420 | gibberellin 20 oxidase 1-B, putative, expressed                                                               | 0          | 0           | NA          | 1           | 1        |
| osa-miR531b     | 0   | 16  | 0.01     | 11.2197  | 6.98683254   | 3.07E-05    | ** | LOC_Os07g09560 | ankyrin repeat family protein, putative, expressed                                                            | 0          | 0           | NA          | 1           | 1        |
| osa-miR531b     | 0   | 16  | 0.01     | 11.2197  | 6.98683254   | 3.07E-05    | ** | LOC_Os09g33690 | Os9bglu32 - beta-glucosidase homologue, similar to G. max hydroxyisourate hydrolase, expressed                | 0          | 0           | NA          | 1           | 1        |
| osa-miR531b     | 0   | 16  | 0.01     | 11.2197  | 6.98683254   | 3.07E-05    | ** | LOC_Os11g08410 | GATA zinc finger domain containing protein, expressed                                                         | 0          | 0           | NA          | 1           | 1        |
| osa-miR531b     | 0   | 16  | 0.01     | 11.2197  | 6.98683254   | 3.07E-05    | ** | LOC_Os11g24550 | MBTB1 - Bric-a-Brac, Tramtrack, Broad Complex BTB domain with Meprin and TRAF Homology MATH domain, expressed | 0          | 0           | NA          | 1           | 1        |
| osa-miR1861b    | 22  | 206 | 16.3701  | 144.4542 | 3.170325117  | 7.85E-37    | ** | LOC_Os09g27150 | protein kinase domain containing protein, expressed                                                           | 0          | 0           | NA          | 1           | 1        |
| osa-miR1861f    | 22  | 206 | 16.3701  | 144.4542 | 3.170325117  | 7.85E-37    | ** | LOC_Os09g27150 | protein kinase domain containing protein, expressed                                                           | 0          | 0           | NA          | 1           | 1        |
| osa-miR1861i    | 22  | 206 | 16.3701  | 144.4542 | 3.170325117  | 7.85E-37    | ** | LOC_Os09g27150 | protein kinase domain containing protein, expressed                                                           | 0          | 0           | NA          | 1           | 1        |
| osa-miR1861l    | 22  | 206 | 16.3701  | 144.4542 | 3.170325117  | 7.85E-37    | ** | LOC_Os09g27150 | protein kinase domain containing protein, expressed                                                           | 0          | 0           | NA          | 1           | 1        |
| osa-miR3979-3p  | 3   | 15  | 2.2323   | 10.5185  | 2.226604058  | 0.007563544 | ** | LOC_Os06g49380 | NBS-LRR disease resistance protein, putative, expressed                                                       | 0          | 0           | NA          | 1           | 1        |
| osa-miR3979-3p  | 3   | 15  | 2.2323   | 10.5185  | 2.226604058  | 0.007563544 | ** | LOC_Os06g49380 | NBS-LRR disease resistance protein, putative, expressed                                                       | 0          | 0           | NA          | 1           | 1        |
| osa-miR3979-3p  | 3   | 15  | 2.2323   | 10.5185  | 2.226604058  | 0.007563544 | ** | LOC_Os06g49380 | NBS-LRR disease resistance protein, putative, expressed                                                       | 0          | 0           | NA          | 1           | 1        |
| osa-miR530-5p   | 23  | 67  | 17.1142  | 46.9827  | 1.487976882  | 1.14E-05    | ** | LOC_Os01g29840 | no apical meristem protein, putative, expressed                                                               | 0          | 0           | NA          | 1           | 1        |
| osa-miR530-5p   | 23  | 67  | 17.1142  | 46.9827  | 1.487976882  | 1.14E-05    | ** | LOC_Os10g29450 | expressed protein                                                                                             | 0          | 0           | NA          | 1           | 1        |
| osa-miR530-5p   | 23  | 67  | 17.1142  | 46.9827  | 1.487976882  | 1.14E-05    | ** | LOC_Os12g42290 | expressed protein                                                                                             | 0          | 0           | NA          | 1           | 1        |
| osa-miR1432-5p  | 141 | 336 | 104.9176 | 235.6145 | 1.202455295  | 1.23E-17    | ** | LOC_Os03g59790 | EF hand family protein, putative, expressed                                                                   | 0          | 0           | NA          | 1           | 1        |
| osa-miR1432-5p  | 141 | 336 | 104.9176 | 235.6145 | 1.202455295  | 1.23E-17    | ** | LOC_Os03g59870 | EF hand family protein, putative, expressed                                                                   | 0          | 0           | NA          | 1           | 1        |
| osa-miR528-3p   | 21  | 48  | 15.626   | 33.6592  | 1.138446186  | 0.002223801 | ** | LOC_Os02g07200 | protein-O-fucosyltransferase 1, putative, expressed                                                           | 0          | 0           | NA          | 1           | 1        |
| osa-miR529b     | 32  | 71  | 23.8111  | 49.7876  | 1.097200205  | 0.000352974 | ** | LOC_Os01g03420 | seven in absentia protein family protein, putative, expressed                                                 | 0          | 0           | NA          | 1           | 1        |
| osa-miR529b     | 32  | 71  | 23.8111  | 49.7876  | 1.097200205  | 0.000352974 | ** | LOC_Os05g49460 | CTP synthase, putative, expressed                                                                             | 0          | 0           | NA          | 1           | 1        |
| osa-miR529b     | 32  | 71  | 23.8111  | 49.7876  | 1.097200205  | 0.000352974 | ** | LOC_Os08g34820 | OsFBX292 - F-box domain containing protein, expressed                                                         | 0          | 0           | NA          | 1           | 1        |
| osa-miR167c-3p  | 22  | 7   | 16.3701  | 4.9086   | -1.683740609 | 0.008174891 | ** | LOC_Os02g52590 | xyloglucan fucosyltransferase, putative, expressed                                                            | 0          | 0           | NA          | 1           | 1        |
| osa-miR1846d-3p | 6   | 17  | 4.4646   | 11.921   | 1.434409235  | 0.034791993 | *  | LOC_Os01g09870 | expressed protein                                                                                             | 0          | 0           | NA          | 0           | 0        |
| osa-miR1846d-3p | 6   | 17  | 4.4646   | 11.921   | 1.434409235  | 0.034791993 | *  | LOC_Os06g35920 | expressed protein                                                                                             | 0          | 0           | NA          | 0           | 0        |
| osa-miR1846d-3p | 6   | 17  | 4.4646   | 11.921   | 1.434409235  | 0.034791993 | *  | LOC_Os08g04800 | triacylglycerol lipase like                                                                                   | 0.292885   | 0.168909    | NA          | 0           | 0.419757 |



|                 |    |     |         |          |             |             |    |                |                                                               |   |   |    |   |   |
|-----------------|----|-----|---------|----------|-------------|-------------|----|----------------|---------------------------------------------------------------|---|---|----|---|---|
|                 |    |     |         |          |             |             |    |                | protein, putative, expressed                                  |   |   |    |   |   |
| osa-miR1846d-3p | 6  | 17  | 4.4646  | 11.921   | 1.434409235 | 0.034791993 | *  | LOC_Os08g39220 | OsWAK75 - OsWAK<br>receptor-like protein kinase,<br>expressed | 0 | 0 | NA | 0 | 0 |
| osa-miR1846d-3p | 6  | 17  | 4.4646  | 11.921   | 1.434409235 | 0.034791993 | *  | LOC_Os09g28400 | alpha-amylase precursor,<br>putative, expressed               | 0 | 0 | NA | 0 | 0 |
| osa-miR531a     | 0  | 23  | 0.01    | 16.1284  | 7.506928563 | 2.41E-07    | ** |                |                                                               |   |   |    |   |   |
| osa-miR531c     | 0  | 23  | 0.01    | 16.1284  | 7.506928563 | 2.41E-07    | ** |                |                                                               |   |   |    |   |   |
| osa-miR1862a    | 26 | 533 | 19.3465 | 373.7576 | 4.301495202 | 1.59E-117   | ** |                |                                                               |   |   |    |   |   |
| osa-miR1862b    | 26 | 533 | 19.3465 | 373.7576 | 4.301495202 | 1.59E-117   | ** |                |                                                               |   |   |    |   |   |
| osa-miR1862c    | 26 | 533 | 19.3465 | 373.7576 | 4.301495202 | 1.59E-117   | ** |                |                                                               |   |   |    |   |   |
| osa-miR396e-3p  | 12 | 41  | 8.9292  | 28.7506  | 1.71276181  | 0.000130031 | ** |                |                                                               |   |   |    |   |   |

**Supplemental Table S4. The GO annotation of 94 resistance-related targets exhibiting the opposite expression to 46 differently expressed miRNAs.**

| Query ID         | Query Symbol     | Description                                                                                                          | E-Value | GO ID      | GO Term                           | P-Value     | Enrichment  | MicroRNA         | Material   |
|------------------|------------------|----------------------------------------------------------------------------------------------------------------------|---------|------------|-----------------------------------|-------------|-------------|------------------|------------|
| LOC_Os02g41800   | Os02g0628600     | Similar to Auxin response factor 8.                                                                                  | 0       | GO:0009725 | response to hormone               | 1.30048E-08 | 14.29602144 | osa-miR160e-5p   | P15        |
| LOC_Os04g59430.1 | Os04g0690600     | Similar to Auxin response factor 13.                                                                                 | 6E-68   | GO:0009725 | response to hormone               | 1.30048E-08 | 14.29602144 | osa-miR160e-5p   | P15        |
| LOC_Os06g47150   | Os06g0685700     | Auxin response factor 18                                                                                             | 0       | GO:0009725 | response to hormone               | 1.30048E-08 | 14.29602144 | osa-miR160e-5p   | P15        |
| LOC_Os02g41800   | Os02g0628600     | Similar to Auxin response factor 8.                                                                                  | 0       | GO:0009725 | response to hormone               | 1.30048E-08 | 14.29602144 | osa-miR160f-5p   | P15        |
| LOC_Os04g59430.1 | Os04g0690600     | Similar to Auxin response factor 13.                                                                                 | 6E-68   | GO:0009725 | response to hormone               | 1.30048E-08 | 14.29602144 | osa-miR160f-5p   | P15        |
| LOC_Os06g47150   | Os06g0685700     | Auxin response factor 18                                                                                             | 0       | GO:0009725 | response to hormone               | 1.30048E-08 | 14.29602144 | osa-miR160f-5p   | P15        |
| LOC_Os06g06050.1 | Os06g0154200     | F-box/LRR-repeat MAX2 homolog (F-box and leucine-rich repeat MAX2 homolog).                                          | 1E-174  | GO:0009734 | auxin-activated signaling pathway | 1.45877E-07 | 5.207836381 | osa-miR172d-5p   | P15        |
| LOC_Os05g10580.1 | LOC_Os05g10580.1 | Hypothetical conserved gene.                                                                                         | 4E-49   | GO:0009734 | auxin-activated signaling pathway | 1.45877E-07 | 5.207836381 | osa-miR396c-5p   | P15        |
| LOC_Os01g53880   | Os01g0741900     | Similar to Auxin-responsive protein IAA26 (Indoleacetic acid-induced protein 26) (Phytochrome-associated protein 1). | 6E-47   | GO:0009734 | auxin-activated signaling pathway | 1.45877E-07 | 5.207836381 | osa-miR408-3p    | P15        |
| LOC_Os11g11410   | Os11g0221000     | Aux/IAA_ARF_dimerisation domain containing protein.                                                                  | 6E-21   | GO:0009734 | auxin-activated signaling pathway | 1.45877E-07 | 5.207836381 | osa-miR444a-3p.2 | P15        |
| LOC_Os11g11410   | Os11g0221000     | Aux/IAA_ARF_dimerisation domain containing protein.                                                                  | 6E-21   | GO:0009734 | auxin-activated signaling pathway | 1.45877E-07 | 5.207836381 | osa-miR444d.2    | P15        |
| LOC_Os11g11410   | Os11g0221000     | Aux/IAA_ARF_dimerisation domain containing protein.                                                                  | 6E-21   | GO:0009734 | auxin-activated signaling pathway | 1.45877E-07 | 5.207836381 | osa-miR444e      | P15        |
| LOC_Os04g56790.1 | Os04g0663700     | Similar to OSIGBa0099L20.7 protein.                                                                                  | 4E-130  | GO:0009734 | auxin-activated signaling pathway | 1.45877E-07 | 5.207836381 | osa-miR6248      | PC         |
| LOC_Os06g44970.1 | Os06g0660200     | Similar to Auxin efflux carrier protein.                                                                             | 0       | GO:0009734 | auxin-activated signaling pathway | 1.45877E-07 | 5.207836381 | osa-miR6248      | PC         |
| LOC_Os01g34890.1 | LOC_Os01g34890.1 | Similar to predicted protein.                                                                                        | 0       | GO:0052543 | callose deposition in cell wall   | 3.23625E-06 | 13.1344697  | osa-miR408-3p    | P15        |
| LOC_Os02g49840   | Os02g0731200     | Transcription factor MADS57.                                                                                         | 2E-70   | GO:0052543 | callose deposition in cell wall   | 3.23625E-06 | 13.1344697  | osa-miR444a-3p.1 | P15        |
| LOC_Os08g33488.1 | Os08g0431900     | Transcription factor MADS23.                                                                                         | 1E-56   | GO:0052543 | callose deposition in cell wall   | 3.23625E-06 | 13.1344697  | osa-miR444a-3p.1 | P15        |
| LOC_Os04g23910.1 | Os04g0304400     | Similar to MADS-box protein AGL16-II.                                                                                | 2E-62   | GO:0052543 | callose deposition in cell wall   | 3.23625E-06 | 13.1344697  | osa-miR444a-3p.2 | P15        |
| LOC_Os02g49840   | Os02g0731200     | Transcription factor MADS57.                                                                                         | 2E-70   | GO:0052543 | callose deposition in cell wall   | 3.23625E-06 | 13.1344697  | osa-miR444a-3p.2 | P15        |
| LOC_Os08g33488.1 | Os08g0431900     | Transcription factor MADS23.                                                                                         | 1E-56   | GO:0052543 | callose deposition in cell wall   | 3.23625E-06 | 13.1344697  | osa-miR444a-3p.2 | P15        |
| LOC_Os02g49840   | Os02g0731200     | Transcription factor MADS57.                                                                                         | 2E-70   | GO:0052543 | callose deposition in cell wall   | 3.23625E-06 | 13.1344697  | osa-miR444d.1    | P15        |
| LOC_Os08g33488.1 | Os08g0431900     | Transcription factor MADS23.                                                                                         | 1E-56   | GO:0052543 | callose deposition in cell wall   | 3.23625E-06 | 13.1344697  | osa-miR444d.1    | P15        |
| LOC_Os04g23910.1 | Os04g0304400     | Similar to MADS-box protein AGL16-II.                                                                                | 2E-62   | GO:0052543 | callose deposition in cell wall   | 3.23625E-06 | 13.1344697  | osa-miR444d.2    | P15        |
| LOC_Os02g49840   | Os02g0731200     | Transcription factor MADS57.                                                                                         | 2E-70   | GO:0052543 | callose deposition in cell wall   | 3.23625E-06 | 13.1344697  | osa-miR444d.2    | P15        |
| LOC_Os08g33488.1 | Os08g0431900     | Transcription factor MADS23.                                                                                         | 1E-56   | GO:0052543 | callose deposition in cell wall   | 3.23625E-06 | 13.1344697  | osa-miR444d.2    | P15        |
| LOC_Os04g23910.1 | Os04g0304400     | Similar to MADS-box protein AGL16-II.                                                                                | 2E-62   | GO:0052543 | callose deposition in cell wall   | 3.23625E-06 | 13.1344697  | osa-miR444e      | P15        |
| LOC_Os02g49840   | Os02g0731200     | Transcription factor MADS57.                                                                                         | 2E-70   | GO:0052543 | callose deposition in cell wall   | 3.23625E-06 | 13.1344697  | osa-miR444e      | P15        |
| LOC_Os08g33488.1 | Os08g0431900     | Transcription factor MADS23.                                                                                         | 1E-56   | GO:0052543 | callose deposition in cell wall   | 3.23625E-06 | 13.1344697  | osa-miR444e      | P15        |
| LOC_Os02g49840   | Os02g0731200     | Transcription factor MADS57.                                                                                         | 2E-70   | GO:0052543 | callose deposition in cell wall   | 3.23625E-06 | 13.1344697  | osa-miR444d.3    | PC         |
| LOC_Os03g19590.1 | Os03g0309200     | Similar to Phytochrome B.                                                                                            | 0       | GO:0009719 | response to endogenous stimulus   | 0.000122517 | 1.898768835 | osa-miR172d-5p   | P15        |
| LOC_Os10g38314.1 | LOC_Os10g38314   | Glutathione S-transferase, N-terminal domain containing protein                                                      | 2E-20   | GO:0009719 | response to endogenous stimulus   | 0.000122517 | 1.898768835 | osa-miR3979-3p   | P15        |
| LOC_Os03g15880   | Os03g0265500     | Similar to Coronatine-insensitive 1.                                                                                 | 0       | GO:0009719 | response to endogenous stimulus   | 0.000122517 | 1.898768835 | osa-miR408-5p    | P15        |
| LOC_Os07g05010   | Os07g0143200     | Similar to Helix-loop-helix DNA-binding domain containing protein, expressed.                                        | 1E-29   | GO:0009719 | response to endogenous stimulus   | 0.000122517 | 1.898768835 | osa-miR530-5p    | P15        |
| LOC_Os05g37640.1 | Os05g0448700     | Conserved hypothetical protein.                                                                                      | 3E-29   | GO:0009719 | response to endogenous stimulus   | 0.000122517 | 1.898768835 | osa-miR531b      | P15        |
| LOC_Os04g51380   | Os04g0602900     | Similar to cDNA clone:J023087M06, full insert sequence.                                                              | 1E-66   | GO:0009719 | response to endogenous stimulus   | 0.000122517 | 1.898768835 | osa-miR530-3p    | P15 and PC |
| LOC_Os01g12160   | Os01g0221100     | GH3 auxin-responsive promoter family protein.                                                                        | 0       | GO:0009719 | response to endogenous stimulus   | 0.000122517 | 1.898768835 | osa-miR6249a     | P15 and PC |
| LOC_Os02g16540   | Os02g0265200     | WRKY transcription factor 39.                                                                                        | 4E-44   | GO:0009719 | response to endogenous stimulus   | 0.000122517 | 1.898768835 | osa-miR6249a     | P15 and PC |
| LOC_Os03g41460.1 | Os03g0610900     | Serine/threonine-protein kinase SAPK10 (EC 2.7.1.37) (Osmotic stress/abscisic acid-activated protein kinase 10).     | 9E-176  | GO:0009719 | response to endogenous stimulus   | 0.000122517 | 1.898768835 | osa-miR6249a     | P15 and PC |
| LOC_Os03g55530.1 | Os03g0764000     | Acyl-CoA N-acyltransferase domain containing protein.                                                                | 1E-142  | GO:0009719 | response to endogenous stimulus   | 0.000122517 | 1.898768835 | osa-miR6249a     | P15 and PC |
| LOC_Os04g49510   | Os04g0584600     | Similar to Calcium dependent protein kinase.                                                                         | 0       | GO:0009719 | response to endogenous            | 0.000122517 | 1.898768835 | osa-miR6249a     | P15 and PC |

|                  |                |                                                                                                                                                                                                  |        |            | stimulus                              |             |             |                 |            |
|------------------|----------------|--------------------------------------------------------------------------------------------------------------------------------------------------------------------------------------------------|--------|------------|---------------------------------------|-------------|-------------|-----------------|------------|
| LOC_Os05g32440.1 | Os05g0390600   | Conserved hypothetical protein.                                                                                                                                                                  | 5E-45  | GO:0009719 | response to endogenous stimulus       | 0.000122517 | 1.898768835 | osa-miR6249a    | P15 and PC |
| LOC_Os06g42120.1 | Os06g0626600   | Sulfotransferase family protein.                                                                                                                                                                 | 1E-71  | GO:0009719 | response to endogenous stimulus       | 0.000122517 | 1.898768835 | osa-miR6249a    | P15 and PC |
| LOC_Os11g07040.1 | Os11g0171500   | Similar to Calcium-dependent protein kinase SK5 (EC 2.7.1.1-) (CDPK).                                                                                                                            | 0      | GO:0009719 | response to endogenous stimulus       | 0.000122517 | 1.898768835 | osa-miR6249a    | P15 and PC |
| LOC_Os12g07230.1 | Os12g0169800   | Similar to Calcium-dependent protein kinase SK5 (EC 2.7.1.1-) (CDPK).                                                                                                                            | 0      | GO:0009719 | response to endogenous stimulus       | 0.000122517 | 1.898768835 | osa-miR6249a    | P15 and PC |
| LOC_Os12g39630.1 | Os12g0586100   | Serine/threonine-protein kinase SAPK9 (EC 2.7.1.37) (Osmotic stress/abscisic acid-activated protein kinase 9).                                                                                   | 4E-173 | GO:0009719 | response to endogenous stimulus       | 0.000122517 | 1.898768835 | osa-miR6249a    | P15 and PC |
| LOC_Os01g12160   | Os01g0221100   | GH3 auxin-responsive promoter family protein.                                                                                                                                                    | 0      | GO:0009719 | response to endogenous stimulus       | 0.000122517 | 1.898768835 | osa-miR6249b    | P15 and PC |
| LOC_Os02g16540   | Os02g0265200   | WRKY transcription factor 39.                                                                                                                                                                    | 4E-44  | GO:0009719 | response to endogenous stimulus       | 0.000122517 | 1.898768835 | osa-miR6249b    | P15 and PC |
| LOC_Os03g41460.1 | Os03g0610900   | Serine/threonine-protein kinase SAPK10 (EC 2.7.1.37) (Osmotic stress/abscisic acid-activated protein kinase 10).                                                                                 | 9E-176 | GO:0009719 | response to endogenous stimulus       | 0.000122517 | 1.898768835 | osa-miR6249b    | P15 and PC |
| LOC_Os03g55530.1 | Os03g0764000   | Acyl-CoA N-acyltransferase domain containing protein.                                                                                                                                            | 1E-142 | GO:0009719 | response to endogenous stimulus       | 0.000122517 | 1.898768835 | osa-miR6249b    | P15 and PC |
| LOC_Os04g49510   | Os04g0584600   | Similar to Calcium dependent protein kinase.                                                                                                                                                     | 0      | GO:0009719 | response to endogenous stimulus       | 0.000122517 | 1.898768835 | osa-miR6249b    | P15 and PC |
| LOC_Os05g32440.1 | Os05g0390600   | Conserved hypothetical protein.                                                                                                                                                                  | 5E-45  | GO:0009719 | response to endogenous stimulus       | 0.000122517 | 1.898768835 | osa-miR6249b    | P15 and PC |
| LOC_Os06g42120.1 | Os06g0626600   | Sulfotransferase family protein.                                                                                                                                                                 | 1E-71  | GO:0009719 | response to endogenous stimulus       | 0.000122517 | 1.898768835 | osa-miR6249b    | P15 and PC |
| LOC_Os11g07040.1 | Os11g0171500   | Similar to Calcium-dependent protein kinase SK5 (EC 2.7.1.1-) (CDPK).                                                                                                                            | 0      | GO:0009719 | response to endogenous stimulus       | 0.000122517 | 1.898768835 | osa-miR6249b    | P15 and PC |
| LOC_Os12g07230.1 | Os12g0169800   | Similar to Calcium-dependent protein kinase SK5 (EC 2.7.1.1-) (CDPK).                                                                                                                            | 0      | GO:0009719 | response to endogenous stimulus       | 0.000122517 | 1.898768835 | osa-miR6249b    | P15 and PC |
| LOC_Os12g39630.1 | Os12g0586100   | Serine/threonine-protein kinase SAPK9 (EC 2.7.1.37) (Osmotic stress/abscisic acid-activated protein kinase 9).                                                                                   | 4E-173 | GO:0009719 | response to endogenous stimulus       | 0.000122517 | 1.898768835 | osa-miR6249b    | P15 and PC |
| LOC_Os07g05370.1 | Os07g0147600   | Protein kinase, core domain containing protein.                                                                                                                                                  | 0      | GO:0009719 | response to endogenous stimulus       | 0.000122517 | 1.898768835 | osa-miR3979-5p  | PC         |
| LOC_Os04g12660   | LOC_Os04g12660 |                                                                                                                                                                                                  | 2E-76  | GO:0009733 | response to auxin                     | 0.000530668 | 2.416228976 | osa-miR530-3p   | P15 and PC |
| LOC_Os05g02500   | Os05g0115800   | Similar to MAP kinase phosphatase (Fragment).                                                                                                                                                    | 2E-47  | GO:0000188 | inactivation of MAPK activity         | 0.000875948 | 20.01443001 | osa-miR5144-3p  | P15        |
| LOC_Os11g04180.1 | Os11g0136800   | Similar to predicted protein.                                                                                                                                                                    | 3E-36  | GO:0000188 | inactivation of MAPK activity         | 0.000875948 | 20.01443001 | osa-miR1850.1   | PC         |
| LOC_Os12g03990.1 | Os12g0133700   | Similar to Dual specificity protein phosphatase 19 (EC 3.1.3.48) (EC 3.1.3.16) (Stress-activated protein kinase pathway-regulating phosphatase 1) (Protein phosphatase SKRP1). Splice isoform 2. | 8E-36  | GO:0000188 | inactivation of MAPK activity         | 0.000875948 | 20.01443001 | osa-miR1850.1   | PC         |
| LOC_Os09g29890   | Os09g0474800   | Phosphatidylinositol 3- and 4-kinase, catalytic domain containing protein.                                                                                                                       | 0      | GO:0046777 | protein autophosphorylation           | 0.001989388 | 2.961776639 | osa-miR167a-5p  | P15        |
| LOC_Os09g29890   | Os09g0474800   | Phosphatidylinositol 3- and 4-kinase, catalytic domain containing protein.                                                                                                                       | 0      | GO:0046777 | protein autophosphorylation           | 0.001989388 | 2.961776639 | osa-miR167b     | P15        |
| LOC_Os09g29890   | Os09g0474800   | Phosphatidylinositol 3- and 4-kinase, catalytic domain containing protein.                                                                                                                       | 0      | GO:0046777 | protein autophosphorylation           | 0.001989388 | 2.961776639 | osa-miR167c-5p  | P15        |
| LOC_Os07g42250.1 | Os07g0614000   | Six-bladed beta-propeller, TolB-like domain containing protein.                                                                                                                                  | 1E-48  | GO:0046777 | protein autophosphorylation           | 0.001989388 | 2.961776639 | osa-miR169r-5p  | P15        |
| LOC_Os03g54084.1 | Os03g0752100   | Similar to Phytochrome C.                                                                                                                                                                        | 0      | GO:0046777 | protein autophosphorylation           | 0.001989388 | 2.961776639 | osa-miR172d-5p  | P15        |
| LOC_Os11g04170.1 | Os11g0136600   | Similar to Calcium-dependent protein kinase (Fragment).                                                                                                                                          | 0      | GO:0046777 | protein autophosphorylation           | 0.001989388 | 2.961776639 | osa-miR6249a    | P15 and PC |
| LOC_Os07g42250.1 | Os07g0614000   | Six-bladed beta-propeller, TolB-like domain containing protein.                                                                                                                                  | 1E-48  | GO:0046777 | protein autophosphorylation           | 0.001989388 | 2.961776639 | osa-miR6249a    | P15 and PC |
| LOC_Os11g04170.1 | Os11g0136600   | Similar to Calcium-dependent protein kinase (Fragment).                                                                                                                                          | 0      | GO:0046777 | protein autophosphorylation           | 0.001989388 | 2.961776639 | osa-miR6249b    | P15 and PC |
| LOC_Os07g42250.1 | Os07g0614000   | Six-bladed beta-propeller, TolB-like domain containing protein.                                                                                                                                  | 1E-48  | GO:0046777 | protein autophosphorylation           | 0.001989388 | 2.961776639 | osa-miR6249b    | P15 and PC |
| LOC_Os05g03920.1 | Os05g0130100   | Hypothetical conserved gene.                                                                                                                                                                     | 5E-150 | GO:0046777 | protein autophosphorylation           | 0.001989388 | 2.961776639 | osa-miR3980a-3p | PC         |
| LOC_Os05g03920.1 | Os05g0130100   | Hypothetical conserved gene.                                                                                                                                                                     | 5E-150 | GO:0046777 | protein autophosphorylation           | 0.001989388 | 2.961776639 | osa-miR3980b-3p | PC         |
| LOC_Os11g04030   | Os11g0135000   | Similar to Major facilitator superfamily antiporter.                                                                                                                                             | 3E-159 | GO:0080167 | response to karrikin                  | 0.0023833   | 3.079143079 | osa-miR1857-3p  | P15        |
| LOC_Os12g03860   | Os12g0132800   | Major facilitator superfamily antiporter.                                                                                                                                                        | 2E-159 | GO:0080167 | response to karrikin                  | 0.0023833   | 3.079143079 | osa-miR1857-3p  | P15        |
| LOC_Os01g03530   | Os01g0126100   | Cupredoxin domain containing protein.                                                                                                                                                            | 0      | GO:0080167 | response to karrikin                  | 0.0023833   | 3.079143079 | osa-miR408-3p   | P15        |
| LOC_Os03g02300.1 | Os03g0114100   | Conserved hypothetical protein.                                                                                                                                                                  | 2E-18  | GO:0080167 | response to karrikin                  | 0.0023833   | 3.079143079 | osa-miR6249a    | P15 and PC |
| LOC_Os03g02300.1 | Os03g0114100   | Conserved hypothetical protein.                                                                                                                                                                  | 2E-18  | GO:0080167 | response to karrikin                  | 0.0023833   | 3.079143079 | osa-miR6249b    | P15 and PC |
| LOC_Os02g49760   | Os02g0730300   | Similar to Potassium transporter HAK3p (Fragment).                                                                                                                                               | 0      | GO:0071805 | potassium ion transmembrane transport | 0.002722439 | 4.618714619 | osa-miR1846d-3p | P15        |
| LOC_Os04g32920   | Os04g0401700   | Potassium transporter 1 (OsHAK1). Splice isoform 2.                                                                                                                                              | 0      | GO:0071805 | potassium ion transmembrane transport | 0.002722439 | 4.618714619 | osa-miR6249a    | P15 and PC |
| LOC_Os07g48130   | Os07g0679000   | Similar to Potassium transporter 2 (AtPOT2) (AtKUP2) (AtKT2).                                                                                                                                    | 0      | GO:0071805 | potassium ion transmembrane transport | 0.002722439 | 4.618714619 | osa-miR6249a    | P15 and PC |
| LOC_Os04g32920   | Os04g0401700   | Potassium transporter 1 (OsHAK1). Splice isoform 2.                                                                                                                                              | 0      | GO:0071805 | potassium ion transmembrane transport | 0.002722439 | 4.618714619 | osa-miR6249b    | P15 and PC |
| LOC_Os07g48130   | Os07g0679000   | Similar to Potassium transporter 2 (AtPOT2)                                                                                                                                                      | 0      | GO:0071805 | potassium ion                         | 0.002722439 | 4.618714619 | osa-miR6249b    | P15 and PC |

|                  |                  |                                                                                                     |        |            |                                          |             |             |                  |            |
|------------------|------------------|-----------------------------------------------------------------------------------------------------|--------|------------|------------------------------------------|-------------|-------------|------------------|------------|
|                  |                  | (AtKUP2) (AtKT2).                                                                                   |        |            | transmembrane transport                  |             |             |                  |            |
| LOC_Os08g42400   | Os08g0535800     | No apical meristem (NAM) protein domain containing protein.                                         | 1E-30  | GO:0010150 | leaf senescence                          | 0.003730684 | 3.752705628 | osa-miR169r-3p   | P15 and PC |
| LOC_Os07g28400.1 | Os07g0467200     | Similar to Clone ZZD536 mRNA sequence.                                                              | 3E-30  | GO:0010150 | leaf senescence                          | 0.003730684 | 3.752705628 | osa-miR6249a     | P15 and PC |
| LOC_Os07g28400.1 | Os07g0467200     | Similar to Clone ZZD536 mRNA sequence.                                                              | 3E-30  | GO:0010150 | leaf senescence                          | 0.003730684 | 3.752705628 | osa-miR6249b     | P15 and PC |
| LOC_Os01g49410.1 | Os01g0688600     | Protein of unknown function DUF1639 family protein.                                                 | 2E-16  | GO:0009693 | ethylene biosynthetic process            | 0.005541594 | 3.473578763 | osa-miR1846d-3p  | P15        |
| LOC_Os03g58010.1 | Os03g0794200     | Similar to N-acetyltransferase.                                                                     | 1E-47  | GO:0009693 | ethylene biosynthetic process            | 0.005541594 | 3.473578763 | osa-miR531b      | P15        |
| LOC_Os01g09700.1 | Os01g0192900     | 1-aminocyclopropane-1-carboxylate synthase family protein.                                          | 2E-173 | GO:0009693 | ethylene biosynthetic process            | 0.005541594 | 3.473578763 | osa-miR6249a     | P15 and PC |
| LOC_Os07g42740.1 | Os07g0619500     | Protein of unknown function DUF1645 family protein.                                                 | 1E-11  | GO:0009693 | ethylene biosynthetic process            | 0.005541594 | 3.473578763 | osa-miR6249a     | P15 and PC |
| LOC_Os01g09700.1 | Os01g0192900     | 1-aminocyclopropane-1-carboxylate synthase family protein.                                          | 2E-173 | GO:0009693 | ethylene biosynthetic process            | 0.005541594 | 3.473578763 | osa-miR6249b     | P15 and PC |
| LOC_Os07g42740.1 | Os07g0619500     | Protein of unknown function DUF1645 family protein.                                                 | 1E-11  | GO:0009693 | ethylene biosynthetic process            | 0.005541594 | 3.473578763 | osa-miR6249b     | P15 and PC |
| LOC_Os11g11490.1 | Os11g0222000     | Regulator of chromosome condensation/beta-lactamase-inhibitor protein II domain containing protein. | 2E-137 | GO:0009693 | ethylene biosynthetic process            | 0.005541594 | 3.473578763 | osa-miR1846e     | PC         |
| LOC_Os07g42740.1 | Os07g0619500     | Protein of unknown function DUF1645 family protein.                                                 | 1E-11  | GO:0009693 | ethylene biosynthetic process            | 0.005541594 | 3.473578763 | osa-miR3980a-3p  | PC         |
| LOC_Os07g42740.1 | Os07g0619500     | Protein of unknown function DUF1645 family protein.                                                 | 1E-11  | GO:0009693 | ethylene biosynthetic process            | 0.005541594 | 3.473578763 | osa-miR3980b-3p  | PC         |
| LOC_Os03g51030   | Os03g0719800     | Phytochrome A, Photoreceptor                                                                        | 0      | GO:0007165 | signal transduction                      | 0.005722752 | 1.565374415 | osa-miR172d-5p   | P15        |
| LOC_Os04g51400   | Os04g0603200     | Similar to C-terminal zinc-finger (Fragment).                                                       | 9E-38  | GO:0007165 | signal transduction                      | 0.005722752 | 1.565374415 | osa-miR530-5p    | P15        |
| LOC_Os12g13300.1 | Os12g0235700     | Serine/threonine protein kinase-related domain containing protein.                                  | 0      | GO:0007165 | signal transduction                      | 0.005722752 | 1.565374415 | osa-miR531b      | P15        |
| LOC_Os01g13800.1 | Os01g0239700     | Similar to Leucine-rich receptor-like protein kinase.                                               | 0      | GO:0007165 | signal transduction                      | 0.005722752 | 1.565374415 | osa-miR169r-3p   | P15 and PC |
| LOC_Os02g08140.1 | Os02g0178000     | Similar to SNF1 related protein kinase-like protein.                                                | 3E-130 | GO:0007165 | signal transduction                      | 0.005722752 | 1.565374415 | osa-miR528-3p    | P15 and PC |
| LOC_Os01g60670.1 | Os01g0821900     | Protein kinase, core domain containing protein.                                                     | 0      | GO:0007165 | signal transduction                      | 0.005722752 | 1.565374415 | osa-miR6249a     | P15 and PC |
| LOC_Os05g41200.1 | Os05g0491000     | EF-Hand type domain containing protein.                                                             | 2E-32  | GO:0007165 | signal transduction                      | 0.005722752 | 1.565374415 | osa-miR6249a     | P15 and PC |
| LOC_Os07g48090.1 | Os07g0678300     | Similar to CBL-interacting protein kinase 29.                                                       | 3E-98  | GO:0007165 | signal transduction                      | 0.005722752 | 1.565374415 | osa-miR6249a     | P15 and PC |
| LOC_Os01g60670.1 | Os01g0821900     | Protein kinase, core domain containing protein.                                                     | 0      | GO:0007165 | signal transduction                      | 0.005722752 | 1.565374415 | osa-miR6249b     | P15 and PC |
| LOC_Os05g41200.1 | Os05g0491000     | EF-Hand type domain containing protein.                                                             | 2E-32  | GO:0007165 | signal transduction                      | 0.005722752 | 1.565374415 | osa-miR6249b     | P15 and PC |
| LOC_Os07g48090.1 | Os07g0678300     | Similar to CBL-interacting protein kinase 29.                                                       | 3E-98  | GO:0007165 | signal transduction                      | 0.005722752 | 1.565374415 | osa-miR6249b     | P15 and PC |
| LOC_Os04g51700.1 | Os04g0606450     | Similar to DNA ligase.                                                                              | 4E-48  | GO:0009628 | response to abiotic stimulus             | 0.009309733 | 1.463756461 | osa-miR167d-3p   | P15        |
| LOC_Os02g56920.1 | Os02g0814200     | Similar to CER1-like gene protein (Fragment).                                                       | 0      | GO:0009628 | response to abiotic stimulus             | 0.009309733 | 1.463756461 | osa-miR444a-3p.2 | P15        |
| LOC_Os02g56920.1 | Os02g0814200     | Similar to CER1-like gene protein (Fragment).                                                       | 0      | GO:0009628 | response to abiotic stimulus             | 0.009309733 | 1.463756461 | osa-miR444d.2    | P15        |
| LOC_Os02g56920.1 | Os02g0814200     | Similar to CER1-like gene protein (Fragment).                                                       | 0      | GO:0009628 | response to abiotic stimulus             | 0.009309733 | 1.463756461 | osa-miR444e      | P15        |
| LOC_Os11g04520   | Os11g0141000     | Similar to PP2A regulatory subunit-like protein.                                                    | 7E-147 | GO:0009628 | response to abiotic stimulus             | 0.009309733 | 1.463756461 | osa-miR530-5p    | P15        |
| LOC_Os07g36700.1 | LOC_Os07g36700.1 | Similar to Mixed-linked glucan synthase 2.                                                          | 0      | GO:0009628 | response to abiotic stimulus             | 0.009309733 | 1.463756461 | osa-miR531b      | P15        |
| LOC_Os12g35610   | Os12g0541300     | Similar to Respiratory burst oxidase homolog protein B.                                             | 0      | GO:0009628 | response to abiotic stimulus             | 0.009309733 | 1.463756461 | osa-miR531b      | P15        |
| LOC_Os01g62600.1 | LOC_Os01g62600.1 |                                                                                                     | 0      | GO:0009628 | response to abiotic stimulus             | 0.009309733 | 1.463756461 | osa-miR528-5p    | P15 and PC |
| LOC_Os06g01500   | Os06g0104400     | Similar to IQ calmodulin-binding motif family protein.                                              | 5E-46  | GO:0009628 | response to abiotic stimulus             | 0.009309733 | 1.463756461 | osa-miR528-5p    | P15 and PC |
| LOC_Os05g43490   | Os05g0510400     | Cyclin-like F-box domain containing protein.                                                        | 3E-113 | GO:0009628 | response to abiotic stimulus             | 0.009309733 | 1.463756461 | osa-miR6249a     | P15 and PC |
| LOC_Os06g15170.1 | Os06g0262800     | Similar to Very-long-chain fatty acid condensing enzyme CUT1.                                       | 1E-166 | GO:0009628 | response to abiotic stimulus             | 0.009309733 | 1.463756461 | osa-miR6249a     | P15 and PC |
| LOC_Os06g35574.1 | LOC_Os06g35574.1 | Conserved hypothetical protein.                                                                     |        | GO:0009628 | response to abiotic stimulus             | 0.009309733 | 1.463756461 | osa-miR6249a     | P15 and PC |
| LOC_Os12g42280.1 | Os12g0617400     | Viviparous-14.                                                                                      | 0      | GO:0009628 | response to abiotic stimulus             | 0.009309733 | 1.463756461 | osa-miR6249a     | P15 and PC |
| LOC_Os05g43490   | Os05g0510400     | Cyclin-like F-box domain containing protein.                                                        | 3E-113 | GO:0009628 | response to abiotic stimulus             | 0.009309733 | 1.463756461 | osa-miR6249b     | P15 and PC |
| LOC_Os06g15170.1 | Os06g0262800     | Similar to Very-long-chain fatty acid condensing enzyme CUT1.                                       | 1E-166 | GO:0009628 | response to abiotic stimulus             | 0.009309733 | 1.463756461 | osa-miR6249b     | P15 and PC |
| LOC_Os06g35574.1 | LOC_Os06g35574.1 | Conserved hypothetical protein.                                                                     |        | GO:0009628 | response to abiotic stimulus             | 0.009309733 | 1.463756461 | osa-miR6249b     | P15 and PC |
| LOC_Os12g42280.1 | Os12g0617400     | Viviparous-14.                                                                                      | 0      | GO:0009628 | response to abiotic stimulus             | 0.009309733 | 1.463756461 | osa-miR6249b     | P15 and PC |
| LOC_Os02g34580.1 | Os02g0550800     | Ammonium transporter family protein.                                                                | 4E-177 | GO:0009867 | jasmonic acid mediated signaling pathway | 0.011436281 | 2.010378015 | osa-miR172d-5p   | P15        |
| LOC_Os09g25070   | Os09g0417800     | WRKY transcription factor 62.                                                                       | 2E-35  | GO:0009867 | jasmonic acid mediated signaling pathway | 0.011436281 | 2.010378015 | osa-miR6249a     | P15 and PC |
| LOC_Os09g25070   | Os09g0417800     | WRKY transcription factor 62.                                                                       | 2E-35  | GO:0009867 | jasmonic acid mediated signaling pathway | 0.011436281 | 2.010378015 | osa-miR6249b     | P15 and PC |
| LOC_Os04g43440   | LOC_Os04g43440   | Similar to NBS-LRR type disease resistance protein O2 (Fragment).                                   | 1E-99  | GO:0009867 | jasmonic acid mediated signaling pathway | 0.011436281 | 2.010378015 | osa-miR1846e     | PC         |
| LOC_Os01g67650   | LOC_Os01g67650   |                                                                                                     | 1E-65  | GO:0009867 | jasmonic acid mediated                   | 0.011436281 | 2.010378015 | osa-miR3979-5p   | PC         |

|                  |                  |                                                                                                                                                                                  |        |            |                                             |             |             |                |            |
|------------------|------------------|----------------------------------------------------------------------------------------------------------------------------------------------------------------------------------|--------|------------|---------------------------------------------|-------------|-------------|----------------|------------|
|                  |                  |                                                                                                                                                                                  |        |            | signaling pathway                           |             |             |                |            |
| LOC_Os04g54900.1 | LOC_Os04g54900.1 | Similar to H0423H10.4 protein.                                                                                                                                                   | 1E-20  | GO:0009740 | gibberellic acid mediated signaling pathway | 0.027333669 | 2.729240457 | osa-miR3979-3p | P15        |
| LOC_Os07g10620.1 | Os07g0206900     | Protein of unknown function DUF642 domain containing protein.                                                                                                                    | 4E-100 | GO:0009740 | gibberellic acid mediated signaling pathway | 0.027333669 | 2.729240457 | osa-miR3979-3p | P15        |
| LOC_Os09g02410.1 | Os09g0112100     | Hypothetical protein.                                                                                                                                                            | 2E-20  | GO:0009863 | salicylic acid mediated signaling pathway   | 0.029318731 | 2.161558442 | osa-miR399a    | P15 and PC |
| LOC_Os09g02410.1 | Os09g0112100     | Hypothetical protein.                                                                                                                                                            | 2E-20  | GO:0009863 | salicylic acid mediated signaling pathway   | 0.029318731 | 2.161558442 | osa-miR399b    | P15 and PC |
| LOC_Os09g02410.1 | Os09g0112100     | Hypothetical protein.                                                                                                                                                            | 2E-20  | GO:0009863 | salicylic acid mediated signaling pathway   | 0.029318731 | 2.161558442 | osa-miR399c    | P15 and PC |
| LOC_Os12g36210.1 | Os12g0548450     | Similar to Proteinase inhibitor.                                                                                                                                                 |        | GO:0009607 | response to biotic stimulus                 | 0.0325429   | 1.514185782 | osa-miR531b    | P15        |
| LOC_Os12g06210.1 | Os12g0158900     | Late embryogenesis abundant protein, LEA-14 domain containing protein.                                                                                                           | 4E-14  | GO:0009607 | response to biotic stimulus                 | 0.0325429   | 1.514185782 | osa-miR530-3p  | P15 and PC |
| LOC_Os04g36040.1 | Os04g0441800     | TGF-beta receptor, type I/II extracellular region family protein.                                                                                                                | 0      | GO:0009607 | response to biotic stimulus                 | 0.0325429   | 1.514185782 | osa-miR6249a   | P15 and PC |
| LOC_Os04g36040.1 | Os04g0441800     | TGF-beta receptor, type I/II extracellular region family protein.                                                                                                                | 0      | GO:0009607 | response to biotic stimulus                 | 0.0325429   | 1.514185782 | osa-miR6249b   | P15 and PC |
| LOC_Os03g11010.1 | Os03g0208500     | Integral membrane protein.                                                                                                                                                       | 0      | GO:0009607 | response to biotic stimulus                 | 0.0325429   | 1.514185782 | osa-miR1846e   | PC         |
| LOC_Os04g45290   | Os04g0535600     | Similar to Beta-fructofuranosidase 1 precursor (EC 3.2.1.26) (Sucrose 1) (Invertase 1).                                                                                          | 1E-169 | GO:0009738 | abscisic acid-activated signaling pathway   | 0.038850955 | 1.833382902 | osa-miR408-3p  | P15        |
| LOC_Os05g07880   | Os05g0171000     | Phospholipase D2 (EC 3.1.4.4).                                                                                                                                                   | 0      | GO:0009738 | abscisic acid-activated signaling pathway   | 0.038850955 | 1.833382902 | osa-miR6249a   | P15 and PC |
| LOC_Os05g07880   | Os05g0171000     | Phospholipase D2 (EC 3.1.4.4).                                                                                                                                                   | 0      | GO:0009738 | abscisic acid-activated signaling pathway   | 0.038850955 | 1.833382902 | osa-miR6249b   | P15 and PC |
| LOC_Os02g12810   | Os02g0220700     | Hypothetical conserved gene.                                                                                                                                                     | 0      | GO:0016310 | phosphorylation                             | 0.046977778 | 1.316618512 | osa-miR167d-3p | P15        |
| LOC_Os04g21110.1 | LOC_Os04g21110.1 | Hypothetical conserved gene.                                                                                                                                                     | 0      | GO:0016310 | phosphorylation                             | 0.046977778 | 1.316618512 | osa-miR172d-5p | P15        |
| LOC_Os06g05070.1 | Os06g0142650     | Similar to Avr9/CF-9 rapidly elicited protein 11 (Fragment).                                                                                                                     | 9E-106 | GO:0016310 | phosphorylation                             | 0.046977778 | 1.316618512 | osa-miR531b    | P15        |
| LOC_Os03g53230.1 | Os03g0743900     | Similar to ATP sulfurylase.                                                                                                                                                      | 0      | GO:0016310 | phosphorylation                             | 0.046977778 | 1.316618512 | osa-miR395l    | P15 and PC |
| LOC_Os03g53230.1 | Os03g0743900     | Similar to ATP sulfurylase.                                                                                                                                                      | 0      | GO:0016310 | phosphorylation                             | 0.046977778 | 1.316618512 | osa-miR395m    | P15 and PC |
| LOC_Os03g53230.1 | Os03g0743900     | Similar to ATP sulfurylase.                                                                                                                                                      | 0      | GO:0016310 | phosphorylation                             | 0.046977778 | 1.316618512 | osa-miR395n    | P15 and PC |
| LOC_Os03g53230.1 | Os03g0743900     | Similar to ATP sulfurylase.                                                                                                                                                      | 0      | GO:0016310 | phosphorylation                             | 0.046977778 | 1.316618512 | osa-miR395p    | P15 and PC |
| LOC_Os03g53230.1 | Os03g0743900     | Similar to ATP sulfurylase.                                                                                                                                                      | 0      | GO:0016310 | phosphorylation                             | 0.046977778 | 1.316618512 | osa-miR395q    | P15 and PC |
| LOC_Os03g53230.1 | Os03g0743900     | Similar to ATP sulfurylase.                                                                                                                                                      | 0      | GO:0016310 | phosphorylation                             | 0.046977778 | 1.316618512 | osa-miR395r    | P15 and PC |
| LOC_Os02g17910.1 | Os02g0280400     | Similar to casein kinase I isoform delta-like.                                                                                                                                   | 5E-164 | GO:0016310 | phosphorylation                             | 0.046977778 | 1.316618512 | osa-miR399a    | P15 and PC |
| LOC_Os02g17910.1 | Os02g0280400     | Similar to casein kinase I isoform delta-like.                                                                                                                                   | 5E-164 | GO:0016310 | phosphorylation                             | 0.046977778 | 1.316618512 | osa-miR399b    | P15 and PC |
| LOC_Os02g17910.1 | Os02g0280400     | Similar to casein kinase I isoform delta-like.                                                                                                                                   | 5E-164 | GO:0016310 | phosphorylation                             | 0.046977778 | 1.316618512 | osa-miR399c    | P15 and PC |
| LOC_Os02g17910.1 | Os02g0280400     | Similar to casein kinase I isoform delta-like.                                                                                                                                   | 5E-164 | GO:0016310 | phosphorylation                             | 0.046977778 | 1.316618512 | osa-miR399d    | P15 and PC |
| LOC_Os04g41100   | Os04g0488000     | Similar to PITSLRE serine/threonine-protein kinase CDC2L1 (EC 2.7.1.37) (Galactosyltransferase associated protein kinase p58/GTA) (Cell division cycle 2-like protein kinase 1). | 0      | GO:0016310 | phosphorylation                             | 0.046977778 | 1.316618512 | osa-miR530-3p  | P15 and PC |
| LOC_Os01g59360.1 | Os01g0808400     | Similar to Calcium-dependent protein kinase (Fragment).                                                                                                                          | 0      | GO:0016310 | phosphorylation                             | 0.046977778 | 1.316618512 | osa-miR6249a   | P15 and PC |
| LOC_Os03g60810.1 | Os03g0823000     | Resistance protein candidate (Fragment).                                                                                                                                         | 0      | GO:0016310 | phosphorylation                             | 0.046977778 | 1.316618512 | osa-miR6249a   | P15 and PC |
| LOC_Os01g59360.1 | Os01g0808400     | Similar to Calcium-dependent protein kinase (Fragment).                                                                                                                          | 0      | GO:0016310 | phosphorylation                             | 0.046977778 | 1.316618512 | osa-miR6249b   | P15 and PC |
| LOC_Os03g60810.1 | Os03g0823000     | Resistance protein candidate (Fragment).                                                                                                                                         | 0      | GO:0016310 | phosphorylation                             | 0.046977778 | 1.316618512 | osa-miR6249b   | P15 and PC |
| LOC_Os05g34390.1 | LOC_Os05g34390.1 |                                                                                                                                                                                  | 2E-70  | GO:0016310 | phosphorylation                             | 0.046977778 | 1.316618512 | osa-miR166k-5p | PC         |

## Supplemental Table S5. Primers used for qRT-PCR and transformation of rice protoplasts.

### Primers used for qRT-PCR.

| Primer Name         | Primer Sequences                                    |
|---------------------|-----------------------------------------------------|
| SL1-miR166a-3p      | GTCGTATCCAGTGCAGGGTCCGAGGTATTTCGACTGGATACGACGGGAAT  |
| Q1-miR166a-3p       | ccTCGGACCAGGCTTCATT                                 |
| SL2-miR169h         | GTCGTATCCAGTGCAGGGTCCGAGGTATTTCGACTGGATACGACCAGGCAA |
| Q2-miR169h          | cggcTAGCCAAGGATGACTT                                |
| SL3-miR168a-3p      | GTCGTATCCAGTGCAGGGTCCGAGGTATTTCGACTGGATACGACATTCAC  |
| Q3-miR168a-3p       | ATGATCCCCTTCACCAA                                   |
| SL4-miR396c-5p      | GTCGTATCCAGTGCAGGGTCCGAGGTATTTCGACTGGATACGACAAGTTCA |
| Q4-miR396c-5p       | ccgcTCCACAGCTTCTTG                                  |
| SL5-miR399d         | GTCGTATCCAGTGCAGGGTCCGAGGTATTTCGACTGGATACGACCAGGGCA |
| Q5-miR399d          | gcgTGCCAAAGGAGAGTTG                                 |
| SL6-miR444e         | GTCGTATCCAGTGCAGGGTCCGAGGTATTTCGACTGGATACGACAAGCTTG |
| Q6-miR444e          | TTCCTGCAGTTGCTGCCTC                                 |
| SL7-miR827          | GTCGTATCCAGTGCAGGGTCCGAGGTATTTCGACTGGATACGACTGTTTGC |
| Q7-miR827           | gcccggTTAGATGACCATCAGC                              |
| SL8-miR1425-5p      | GTCGTATCCAGTGCAGGGTCCGAGGTATTTCGACTGGATACGACAGCAGCA |
| Q8-miR1425-5p       | gcccTAGGATTCATCCTT                                  |
| SL9-MIR8155-y       | GTCGTATCCAGTGCAGGGTCCGAGGTATTTCGACTGGATACGACTGGTATC |
| Q9-MIR8155-y        | gcccAACCTGGCTCTGA                                   |
| SL10-MIR5168-y      | GTCGTATCCAGTGCAGGGTCCGAGGTATTTCGACTGGATACGACGAAGGGA |
| Q10-MIR5168-y       | atgTCGGACCAGGCTTCAATC                               |
| SL11-MIR8175-y      | GTCGTATCCAGTGCAGGGTCCGAGGTATTTCGACTGGATACGACTGGCGCC |
| Q11-MIR8175-y       | atgcTCCCCGGCAACGG                                   |
| SL12-novel-m0131-5p | GTCGTATCCAGTGCAGGGTCCGAGGTATTTCGACTGGATACGACTAAGACG |
| Q12-novel-m0131-5p  | ggggTAACGTTTGACTACTCG                               |
| SL13-novel-m0269-3p | GTCGTATCCAGTGCAGGGTCCGAGGTATTTCGACTGGATACGACTCCCT   |
| Q13-novel-m0269-3p  | ggggTTTTTTTTCTAGGACAGAG                             |
| SL14-novel-m0465-3p | GTCGTATCCAGTGCAGGGTCCGAGGTATTTCGACTGGATACGACGTTTTTA |
| Q14-novel-m0465-3p  | ggggTCAAACGTTGCAAGTA                                |
| SL15-novel-m0017-3p | GTCGTATCCAGTGCAGGGTCCGAGGTATTTCGACTGGATACGACAAGAGCA |
| Q15-novel-m0017-3p  | ggggTCAAAGACCGTAGAATTG                              |
| SL16-novel-m0073-5p | GTCGTATCCAGTGCAGGGTCCGAGGTATTTCGACTGGATACGACGGATAAT |
| Q16-novel-m0073-5p  | atgcTCATTGGCGATCGGAT                                |
| SL17-novel-m0546-3p | GTCGTATCCAGTGCAGGGTCCGAGGTATTTCGACTGGATACGACAGTCAA  |
| Q17-novel-m0546-3p  | ggccgcgTATTATAAGACGTTT                              |
| SL18-novel-m0494-3p | GTCGTATCCAGTGCAGGGTCCGAGGTATTTCGACTGGATACGACAGTTTTT |
| Q18-novel-m0494-3p  | ggggTTAAACGTTGCAAGTAA                               |
| U6-F                | TACAGATAAGATTAGCATGGCCCC                            |
| U6-R                | GGACCATTTCTCGATTGTACGTG                             |
| SL-universal R      | GTGCAGGGTCCGAGGTATTTC                               |

### Primers used for transformation of rice protoplasts.

| Primer Name      | Primer Sequences            |
|------------------|-----------------------------|
| miR160f-5pF      | TACCACTGCTACTCTGCCTG        |
| miR160f-5pR      | AGTGCAAAATAGAGGATCGCA       |
| miR167a-5pF      | GCCAAGCCTGAAACACTTTG        |
| miR167a-5pR      | ACATACACTGAGAAATCCAGCA      |
| ARF16-FSpeI      | GACTAGTATGATCAGTTCGCGGACCT  |
| ARF16-RSpeI      | GACTAGTGCTCCCTAAGTTGTCGCTCC |
| Os07g29820FXmaJI | CCCTAGGATGGAGACAATTCTAGCTGG |
| Os07g29820RXmaJI | CCCTAGGATGTGAAGAAGCATGCGTGG |
